# Supplementary material for: Improving the Annotation of the Venom Gland Transcriptome of Pamphobeteus verdolaga, Prospecting Novel Bioactive Peptides
Source: MDPI journal article supplement (doi:10.3390/toxins14060408), 2022-06-15
Supplement: s1 [file s1]

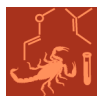

# Supplementary Materials: Improving the annotation of the venom gland transcriptome of *Pamphobeteus verdolaga*, prospecting novel bioactive peptides

Cristian Salinas-Restrepo, Elizabeth Misas, Sebastian Estrada-Gómez, Juan Carlos Quintana-Castillo, Fanny Guzman, Juan C. Calderón, Marco A. Giraldo and Cesar Segura.

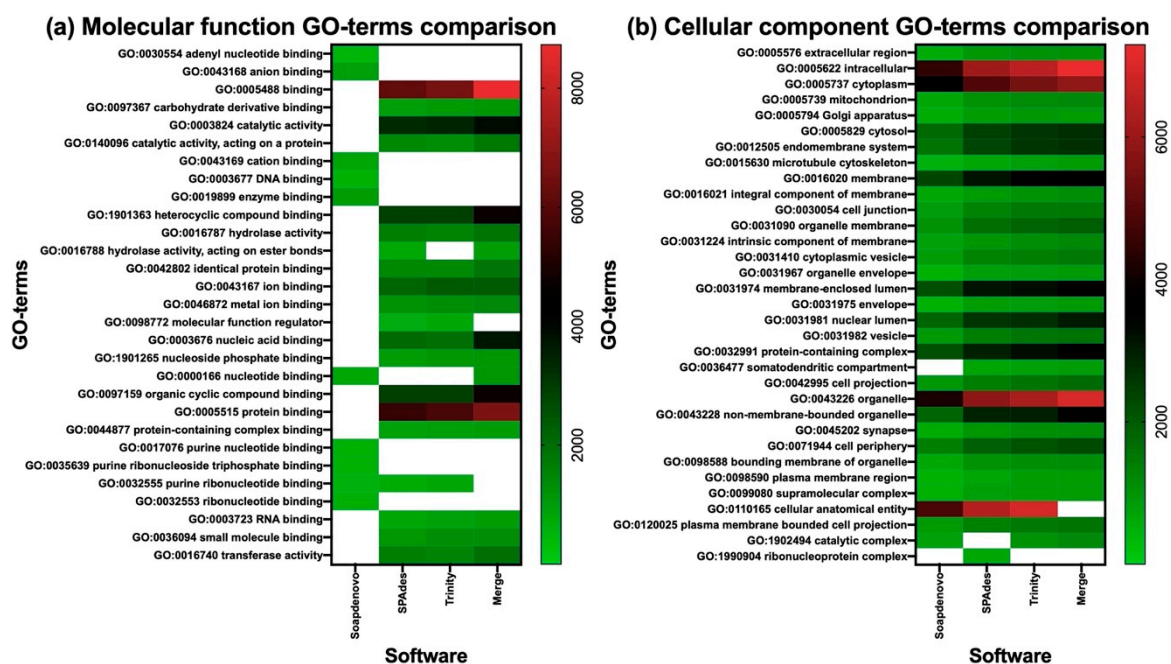

**Figure S1.** Comparison of the molecular function (a) and cellular component (b) non-redundant GO-terms associated to the functional annotation of the ORFs obtained from the Soapdenovo-Trans k-mer 63, SPAdes k-mer 31, Trinity k-mer 25 assemblies and the non-redundant ORF merge. Blank spaces represent absence of genes associated to the non-redundant GO-term.

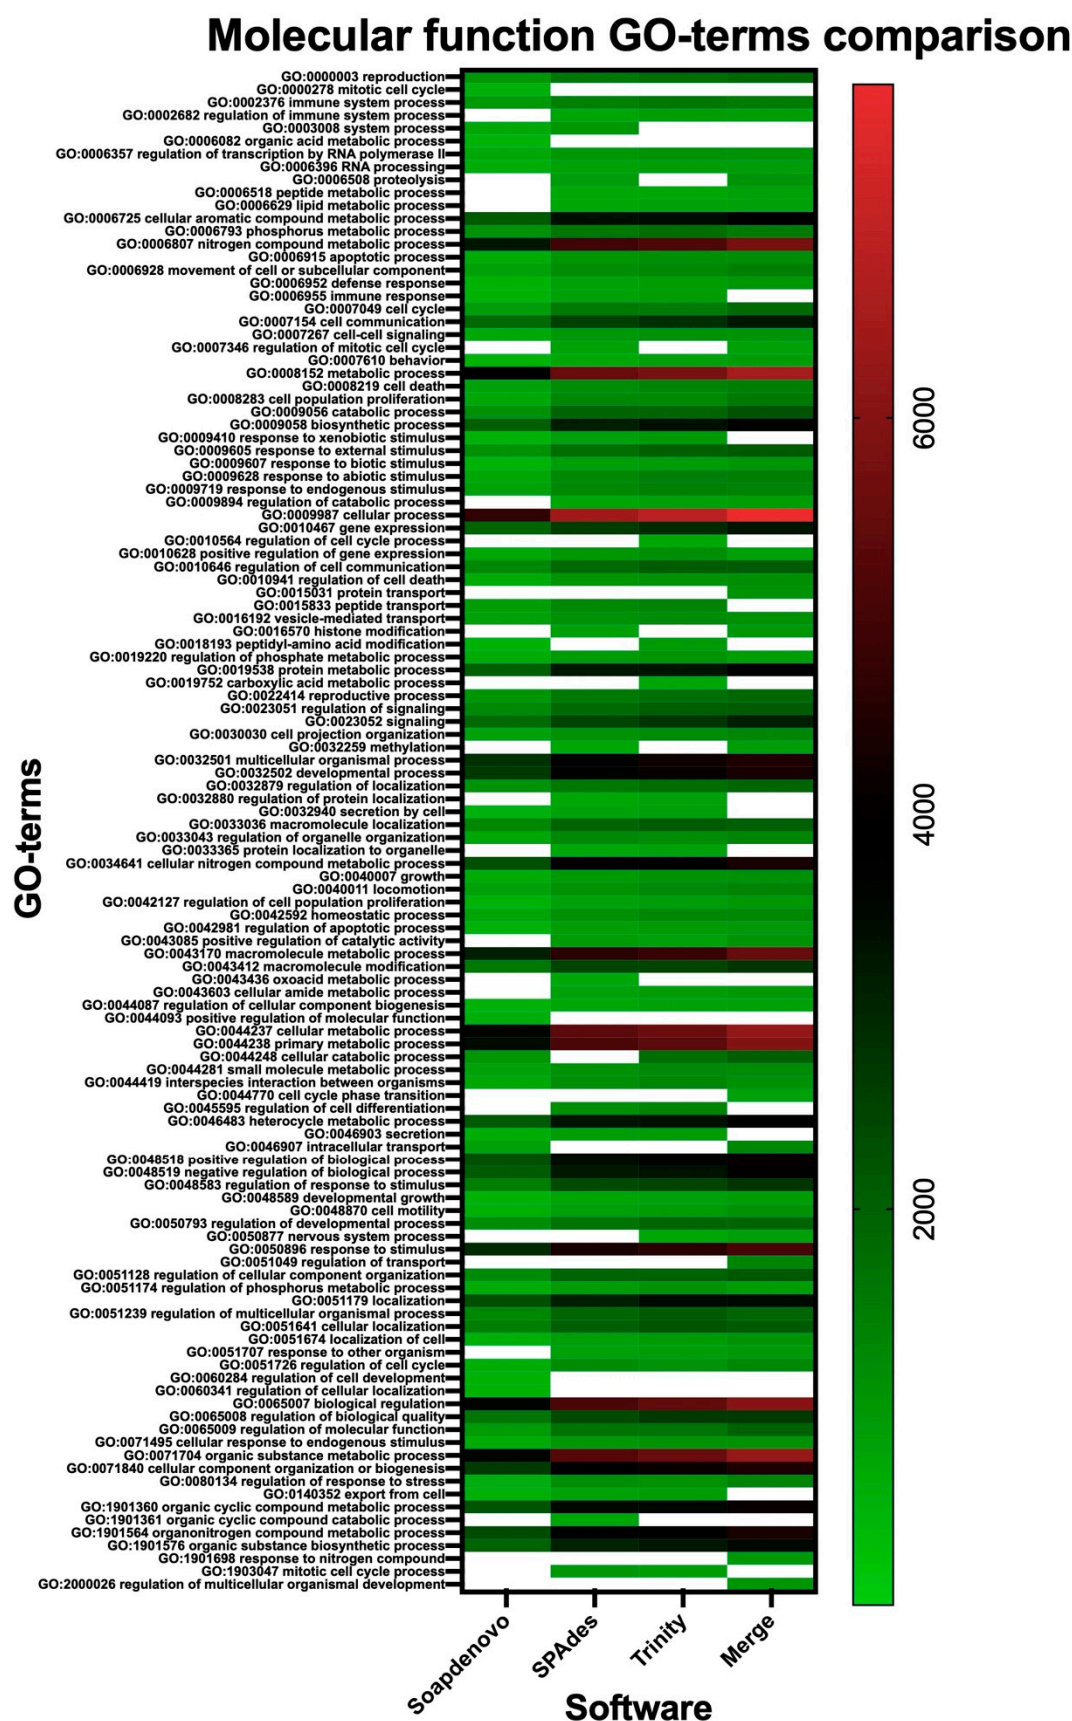

**Figure S2.** Comparison of the biological process non-redundant GO-terms associated to the functional annotation of the ORFs obtained from the Soapdenovo-Trans k-mer 63, SPAdes k-mer 31, Trinity k-mer 25 assemblies and the non-redundant ORF merge. Blank spaces represent absence of genes associated to the non-redundant GO-term.

## Toxin classification (Top 20)

(254 out of 328 ORFs)

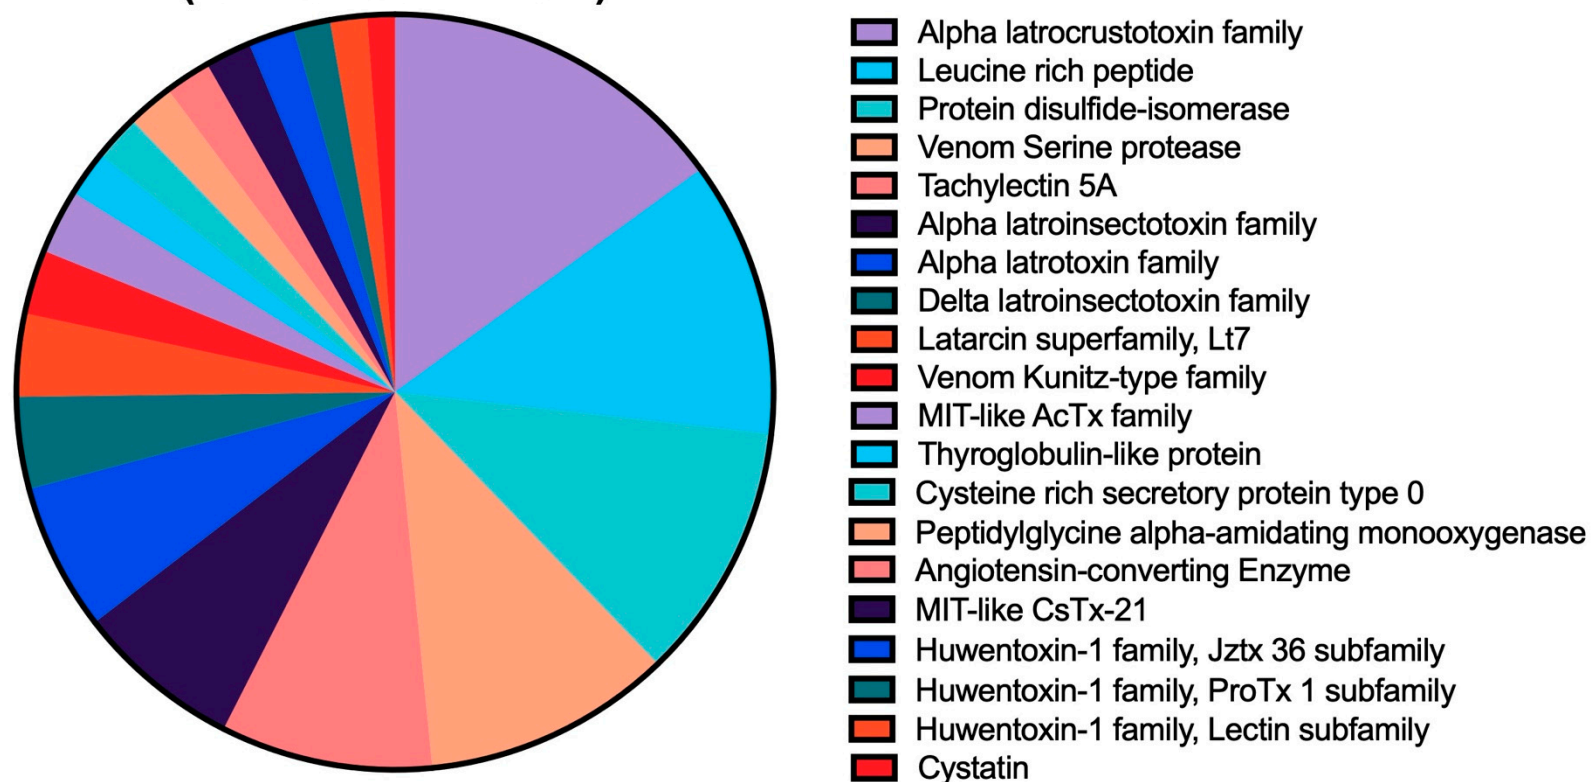

**Figure S3.** Top 20 families classification of the ORFs of interest from the merge annotation obtained from the BLAST (Arachnoserver + ToxProt) and HMM (hmmcompete) prediction strategies.

**Table S1.** List of the molecular function, cellular component and biological process GO-terms uniquely identified in the Trinity k-mer 25, SPAdes k-mer 31 and Soapdenovo-Trans k-mer 63 functional annotation.

| GO Category        | # of total terms | Soapdenovo-Trans                                        | SPAdes                                                 | Trinity                                        |
|--------------------|------------------|---------------------------------------------------------|--------------------------------------------------------|------------------------------------------------|
| Molecular function | 29               | "GO:0030554 adenylyl nucleotide binding"                |                                                        |                                                |
|                    |                  | "GO:0043168 anion binding"                              |                                                        |                                                |
|                    |                  | "GO:0043169 cation binding"                             |                                                        |                                                |
|                    |                  | "GO:0003677 DNA binding"                                |                                                        |                                                |
|                    |                  | "GO:0019899 enzyme binding"                             | "GO:0016788 hydrolase activity, acting on ester bonds" | -                                              |
|                    |                  | "GO:0000166 nucleotide binding"                         |                                                        |                                                |
|                    |                  | "GO:0017076 purine nucleotide binding"                  |                                                        |                                                |
|                    |                  | "GO:0035639 purine ribonucleoside triphosphate binding" |                                                        |                                                |
|                    |                  | "GO:0032553 ribonucleotide binding"                     |                                                        |                                                |
| Cellular component | 33               | -                                                       | "GO:1990904 ribonucleoprotein complex"                 | -                                              |
| Biological process | 113              | "GO:0000278 mitotic cell cycle"                         | "GO:0006508 proteolysis"                               |                                                |
|                    |                  | "GO:0006082 organic acid metabolic process"             | "GO:0007346 regulation of mitotic cell cycle"          | "GO:0010564 regulation of cell cycle process"  |
|                    |                  | "GO:0044093 positive regulation of molecular function"  | "GO:0016570 histone modification"                      | "GO:0019752 carboxylic acid metabolic process" |
|                    |                  | "GO:0046907 intracellular transport"                    | "GO:0032259 methylation"                               | "GO:0050877 nervous system process"            |
|                    |                  | "GO:0060284 regulation of cell development"             | "GO:0043436 oxoacid metabolic process"                 |                                                |
|                    |                  | "GO:0060341 regulation of cellular localization"        | "GO:1901361 organic cyclic compound catabolic process" |                                                |

**Table S2.** Summary of the mature toxins from the merge transcriptome of *Pamphobeteus verdolaga* obtained with the BLAST (Arachnoserver + ToxProt) and HMM (hmmcompete) prediction strategies.

| Cluster | Given name            | sequence_id    | HMM family_name                                             | Blast2GO annotation      | Cys | Length | Proposed mature sequence                                                                                                                                                                                                                                                                                                                                                                                                                                                                                                                                   |
|---------|-----------------------|----------------|-------------------------------------------------------------|--------------------------|-----|--------|------------------------------------------------------------------------------------------------------------------------------------------------------------------------------------------------------------------------------------------------------------------------------------------------------------------------------------------------------------------------------------------------------------------------------------------------------------------------------------------------------------------------------------------------------------|
| 1       | U-theraphotoxin-Pv7c  | Pv_sp_15215.t1 | Huwentoxin-1 family, HaTx subfamily (IPR011696;PF07740;)    | Kappa-theraphotoxin-Gr1a | 6   | 35     | GCGYLFGRQCNDADCKHLGCKRIPKYCAWDGTF                                                                                                                                                                                                                                                                                                                                                                                                                                                                                                                          |
| 1       | U-theraphotoxin-Pv7a  | Pv_sp_10596.t1 | Huwentoxin-1 family, Jztx 36 subfamily (IPR011696;PF07740;) | Kappa-theraphotoxin-Gr1a | 6   | 36     | DCRKMFGGCEKDENCCKHLVCKPTLNCLWDGTFPW                                                                                                                                                                                                                                                                                                                                                                                                                                                                                                                        |
| 1       | U-theraphotoxin-Pv7b  | Pv_sp_11628.t1 | Huwentoxin-1 family, Jztx 36 subfamily (IPR011696;PF07740;) | Kappa-theraphotoxin-Gr1a | 6   | 36     | DCRKLFGSCEKKADCKYLCKRTVKYCAWDGTFPW                                                                                                                                                                                                                                                                                                                                                                                                                                                                                                                         |
| 2       | U-theraphotoxin-Pv12b | Pv_sp_12576.t1 | MIT-like CsTx-22                                            | U-scoloptoxin(18)-Er1a   | 10  | 69     | ELGESCEHSSDCSSGCCMKRKSQCNRAKIGEPSCGGQIKLDLYTERCPC<br>EKGMSICSDEIHKCLA                                                                                                                                                                                                                                                                                                                                                                                                                                                                                      |
| 2       | U-theraphotoxin-Pv12a | Pv_sp_11319.t1 | MIT-like AcTx family (IPR020202;PF17556)                    | Colipase                 | 10  | 73     | NRAVGASCRFSSQCSSGCCVTRTKPGGIRSCARKGKKGDLCEQQIKGGAYVD<br>YCPCEKGDGHCQTGKQSKCLA                                                                                                                                                                                                                                                                                                                                                                                                                                                                              |
| 3       | U-theraphotoxin-Pv51a | Pv_sp_3139.t1  | Thyroglobulin-like protein                                  | SPARC                    | 24  | 510    | SGPVCCTDGRYDSLCDIDVAKCQGHPEFKNFGTCPERARCEAQRALLMK<br>QGNQMFVPECNTDGSYAEVQCHKSTGYCWCVDKDGKPVRGSSVKQRRPNC<br>SSAGRRPNRRRTSRGRRQKKGCSNDRAMFNSNLIDIFESEYNRLEEPPLTTS<br>AGDDADPLTDTHQKAVVQWKFNLQDENGDNLYLKKPEVRDLRRMAKKIVK<br>PKVCAKTFACYCDLDNDKKISRSEWSVCVGVGINNEEVNIMDQVLDAPAV<br>NDHRAANPSSRSLIRPELWDSQRQHLKHDGRLNAENDGSTVELDEKEEEIQ<br>DCETARRAALENHRQDPAAGIYIPECNKEGFYMRACQCHKSQKFCWCVHVRT<br>GKPLKGTQTQGVKPDCEARSSTRQFGKGSFQKKQDFLDELVSFVQVEMED<br>AKNKSLSEAPHTERAARWKFAYIDNSNEVLDRKREWKVFKREWQSFHKDS<br>KQKKRLRKWRNLPRFCDENNNQKITMDEWLMCTGITRDFKAGPAVTSG |
| 4       | U-theraphotoxin-Pv17a | Pv_sp_11450.t1 | Arthropod Phospholipase A2 (IPR01211)                       | Group 10 secretory       | 10  | 116    | SGLDFIGYGNYCGFGGEGKPVDDIDRCCKMHDICYDFAQNDDCAEDPNVVY<br>KIKYGWQQKSFQVQCSFSQSKCMKVVCICDVRFAKCLKNYINEYNNNSNKHE<br>KDLQELLEEVQQMS                                                                                                                                                                                                                                                                                                                                                                                                                              |

| phospholipase A2 |                        |                |                                                                                                |                                 |    |     |                                                                                                                                                                                                                                                                                                                                                                                                                                                                                                                                                           |
|------------------|------------------------|----------------|------------------------------------------------------------------------------------------------|---------------------------------|----|-----|-----------------------------------------------------------------------------------------------------------------------------------------------------------------------------------------------------------------------------------------------------------------------------------------------------------------------------------------------------------------------------------------------------------------------------------------------------------------------------------------------------------------------------------------------------------|
| 4                | U-theraphotoxin -Pv18a | Pv_sp_12864.t1 | Arthropod Phospholipase A2 (IPR001211)                                                         | Phospholipase A2 SSD387         | 10 | 122 | DLDDLADMFEELTQLDPTEYIPYGNWCGYGGDGEILDRIDRCCEIHDRCYGK VSENVCSNEQVHIINYQWNRENDTITCDGNTSKCEMEACMCDRDVVLCHHK HNGDYSHEVRYVRFNQTKN                                                                                                                                                                                                                                                                                                                                                                                                                              |
| 5                | U-theraphotoxin -Pv52a | Pv_sp_1293.t1  | Angiotensin-converting Enzyme (IPR033591)                                                      | Acetylcholines terase           | 6  | 514 | GKLVNIDGNEVTAFLGIPYAEPPVGDQRFKRSVPKQSWSGVYDTTKKPPPCM QYSTKDFPWTMKTSTPSEDCLYLNWVPGNMNFFELGFKSKPVLLWIYGGGFF SGSSSELDIYNGATLAAVGKVIVVTNRYRLGSFGFLTSGTPEAPGNMGMHDQY LAMDWVKNNIKYFKGDPDMITLFGESVGGVSAGLHLISPLSRNLFRRRAIMESG APYHPLAAGNQSVMVVYNSLFATAAGCANDTVTIFTDSKKVIDCLRKTDNRQ LATVESSLLEKVPYFFLPIYGDDLPVDAITAMDKGDFKHTEVLIGNNLDEGA VLLHYISPFGFSQHASQLDKQAAA VITGLFQNSTNPPPVVSEFYLNDISDT DSSTIIKAVVDSYGDFIINCPSVLFAEKFSKGGEAFYYQFTHRSSNSPWGKWKK ACDFWRNYFVPSMGATHFEFVPFVFGDPVRNSSQYTAEEVTFSRVTVMKIWTT FARTGVPTVPKTEGWPKFTESRRLYLELNPKRLRIGEGPH               |
| 5                | U-theraphotoxin -Pv56a | Pv_tr_11548.t1 | Peptidylglycine alpha-amidating monooxygenase (IPR000720)                                      | Acetylcholines terase           | 8  | 528 | HWEGEYNATFLPPPCYQNYTIKFYWTPDVERMTEDCLYLNWVPGSVQETKP KAVFVWIYGGAFNVGSSELDLYNGAILASRGNMVVISFNRYVGMFGFLTTSIP EAKGNMGMFMDQILALKWIKANVHFFGGNSELITLAGESAGAMSAALFLLSPV TRGMVKRVILQSGGIIHPMSTHLKATMFKVAEQVSLFTGCSNNVNSLTTPNPKI VIDCLKNLPPNAISEAEGLLMKIFPITASPYSGEDFMPRNPDTMLIDGDFQDTE VLFGCNRDEGSNFLVFAPEYFGIYGAGAPTRMRKRLSAYIIKTIFERTEQKNNT RDIVRFYVEGRGNRKLNRNEDDGDDETDYFKTAIYDSIGDYMILCPTVFNADF MSVREKPVYFYMFTHRPSTTLNAKWMGATHFDEVFPVFGRLSDDKNYTEE DKTISQRMMDRWIAFTKTGNPNIEGIEWPHYKWNEPLYLDINAEEKIKLKP DDYRCEFWRARFGSTLDHFRSDTNVDTSIGTVSTKKVPFVLLMMCVMMLTMT RT |
| 6                | U-theraphotoxin -Pv20a | Pv_tr_1740.t1  | Venom Kunitz-type family, Long Kunitz domain containing protein (IPR002223;IPR020901;PF00014;) | Tissue factor pathway inhibitor | 10 | 136 | YCPGDLDLGDICSLGPEPGVPGTNISCLAYFPRIYFNGLSGECDIFIFGGCGGN HNNFYTKEECEKFCPPVPQIPFDPTECGQYPEPGDCRAYLQRFHYDKESGDCK EFTWRMWWKQKQLQDAGRMRQRMWWSGDV                                                                                                                                                                                                                                                                                                                                                                                                                |
| 6                | U-theraphotoxin -Pv55a | Pv_tr_3827.t1  | Venom Kunitz-type family, Native Kunitz toxin subfamily (IPR002223;IPR020901;PF00014;)         | Tissue factor pathway inhibitor | 34 | 527 | GPVCSDPKISPRVCKDECVKVTC PQHPEAICLADPCHNCVISFVSVDGTPVTC EDKCRQPLTAGNCRSFLPHYHFNQSSNRCEQFIYGGCHGNDNNFETLETCEQE ECEKKVPMCDQPKDVGLCRAQMFRWFYNKQTHKCEKFVYGGCGGNDNNF ETVEECERMCPDLVICPWWNVNGESLEPCSRSEACGNATCPGNADARCVVD PCTCGPTFVDKQGHSVSCVAETLEESTLRTMSVAQHTRCESMLKRHLIVGDS SYVPQCDDKGEFYVPQCTQEKGSKAQCWCVD EAGMQLPSSSTFPKGTCTCK LVKVQKVEVTLAFKHKDASYSETMVSAIKRLIEQFLMDMKAEYDKLSVIVRPD                                                                                                                                                                        |

|   |                               |               |                                                       |                                                    |    |     |                                                                                                                                                                                                                                                                                                                                                                                                |
|---|-------------------------------|---------------|-------------------------------------------------------|----------------------------------------------------|----|-----|------------------------------------------------------------------------------------------------------------------------------------------------------------------------------------------------------------------------------------------------------------------------------------------------------------------------------------------------------------------------------------------------|
|   |                               |               |                                                       |                                                    |    |     | ATHVMFTLLSDNKVQLAFQLEEMVRMQGIFILPEAEMPVDYRASHFYHILDS<br>KAEVQEEDNSVIANPISSVKLEKERGWATFLSFTVIGVFGFILIYVPLVIHRRR<br>QKKGEEEPTRSSLVGMVFNNTITYGVVGKKAADKNSSASDIPKEVIVQTVAEY<br>ETL                                                                                                                                                                                                                 |
| 7 | U-<br>theraphotoxin<br>-Pv22a | Pv_sp_2566.t1 | Cysteine rich<br>secretory protein<br>type 1          | Cysteine-rich<br>venom protein                     | 16 | 179 | WAEECQILTYDGILGKYVEDYGSCGQNFVSNEKVPWTFVGEAWFAERYDFS<br>YGSYNNSVSEVGHYTMVWNGSHRLGCGFHYCAKDVKKPFYNYVCNCP<br>MGNDPKRLGMPYSSGKPCSECIKHCKYKKLCTNTCPYADLWVNCAQLNVT<br>WNDWLCSNPEHQHRHGRATCLCPGKVI                                                                                                                                                                                                    |
| 7 | U-<br>theraphotoxin<br>-Pv36a | Pv_sp_3922.t1 | Cysteine rich<br>secretory protein<br>type 3          | GLIPR1-like<br>protein 1                           | 32 | 331 | LHNMYRSNVTTPAADMNFMEDWDEYLAKAAQDWANGCRFMHAFPPYVEP<br>GSMGQNLVMGHDPTGVRALLWNEEYIYDIKTLDCVPKGQCGHYTQLAW<br>GDSKSVGCGMKRAIRFLVCHYSPIGNIAGYAPYNIGKPCSQCRTGAGGL<br>CANNMVCVTKELCERSPEKCEYDCPLKCRNCGTLDKESCKCTCSDGWDSLDC<br>SRCKNAHDRCGKNPGWPSVTSCPMNNHVAADTYCRKMCGKCRGVQWSD<br>PEKLCCNGTVCANGYLSEKQNSCTCDLLCPGLCYITPDYDVLETTADVGS<br>HHTKAVYGSFTLVALINFLIPSVHGL                                     |
| 8 | U-<br>theraphotoxin<br>-Pv24a | Pv_sp_6678.t1 | Tachylectin 5A<br>(IPR002181)                         | Fibrinogen C<br>domain-<br>containing<br>protein 1 | 8  | 262 | TTKSPCEKSAKAETYLDTAADMISRVKENLPKDGGVCKCPRKPMDCQQLNC<br>GHTQSKVKVWPKNRIIDGGISVFCDMETDGGGWTVVQRRGDYKRASDFN<br>KKWKEYKTGFGDKERDFWLGNNDNIYALTNQRKYKIDLDQSENTRYAFY<br>DQFWIDNESQNYKLHVYDYFGDAGDSLAPTHGGQMFSTDRDNDKSSTQH<br>CAAKYKGGWWYNECFEANLNGLYDMNGNSVGEEGIKWNSWKSDESLTFTE<br>MKLRPVDY                                                                                                           |
| 8 | U-<br>theraphotoxin<br>-Pv42a | Pv_sp_2022.t1 | Tachylectin 5A<br>(IPR002181)                         | Ficolin-2                                          | 8  | 363 | QFSVLGNELRTEMTSLRIVASSSGSRCGSVDFTDDDDDLQETGIQGRASPRSGR<br>RVSGNSLAGGSASSVEDTLDVLVQSLGNSTREIREEIHQGIQDIDSKLTSISRLSC<br>SEGLETSESVSARKIPPPQQDVAAKSEVCSRVARNVTSPPQSCADLRGGATC<br>DGVYVIFPQNVRAVRTLCDMTTEGGGWTVLMQRGDFNNKMSSFHKNWASY<br>KNGFGDVEGEFWIGNDVIHLLSAQDENILRVNLEAFDDDLNLTYSFSVAD<br>ENDNYKLRLGVTVGTPSPASNSLRYHSNHPFSTFDKKNDNFQNCATYKG<br>GWWFNGCYFGFLTGEYFRPGEKRENWQGILWYDWKGNASLKGAQMKI |
| 9 | U-<br>theraphotoxin<br>-Pv25a | Pv_so_5176.t1 | Venom Serine<br>protease<br>(IPR001314;IPR00<br>1254) | Transmembran<br>e protease<br>serine 9             | 10 | 220 | NATICTASVLSPTCLTAAHCVADDNGNAQNPSYVGMVLGTLADGTGGLI<br>ASVAEIIHPNYNEGGLTQNDIAIVKLSSPVVFTEKIQPVCLGSAPPPFSKCTISG<br>WGKFLHILGVS NVLRYSPHQIVYFDICKIGYSNFPNTTQLCIEGLGLGSCNGD<br>SGGPLVVQRNNRLEQIGVVSYGRPVICNAPIIGLVVYTEVYAFRDWVLQVSND<br>PQICIA                                                                                                                                                      |
| 9 | U-<br>theraphotoxin<br>-Pv29a | Pv_sp_7148.t1 | Venom Serine<br>protease<br>(IPR001314;IPR00<br>1254) | Coagulation<br>factor IX                           | 10 | 278 | PVCECGSNSKPLQTRVVGGKNAAGDFPYATGLLASYNIIIFGRQVLGTMDYT<br>PYCGGTLITDKHVLTAAHCVDRDRTASQIRLDVGEYSIEDKKESRIIRDARSLK<br>HPKYVPKVFNRNDIAIIEAEPVKLNSKLKAAWLPPQDARIASGTPVTVYGWGR<br>LDYEGGRPQVLQMLQMPVVSSECEHLVTPITPNMLCAGGEQKGDACIGD<br>SGSGLTTKRKDENVVVGVVSFGRKCALPHIAGVYTKVSGFSWDWIYENTRSTEC<br>QPCIASLEDAEDSQ                                                                                       |

|   |                       |               |                                             |                        |    |     |                                                                                                                                                                                                                                                                                                                                                                                                  |
|---|-----------------------|---------------|---------------------------------------------|------------------------|----|-----|--------------------------------------------------------------------------------------------------------------------------------------------------------------------------------------------------------------------------------------------------------------------------------------------------------------------------------------------------------------------------------------------------|
| 9 | U-theraphotoxin-Pv37a | Pv_sp_1715.t1 | Venom Serine protease (IPR001314;IPR001254) | Serine protease hepsin | 14 | 334 | DGCLTVDNAGAGECTVFMECRQAVVELKTKFPTICTWDGDVPIVCCPKEKQE<br>DIDDDMLPRTLRLADCGRRRAAVAKRPTIAGGVEAQPGAWPVMAGIYIRNFG<br>RDVFLCGSAIVSDKYVITAAHCFGQRRGGSVIQTARYAIFVGSCLKVKEGTLHTLS<br>SITIHPQYKPREHYNDLAVIEVRERMTFSTYVRPICLPSPGEFQDIDGEDVTVIG<br>WGDQDFGGVQASVLREVTQVIANKDCNDAYTKLRGSSIPEGITNKFICAGV<br>PEGGKDACQKDSGGPLMVARDGVWSLVGIVSFGYQCAQAGYPGVYTRITEYI<br>DWLDESINVEDSSPVPAQ                         |
| 9 | U-theraphotoxin-Pv39a | Pv_sp_4039.t1 | Venom Serine protease (IPR001314;IPR001254) | Coagulation factor XI  | 12 | 341 | TPCPLANLQCCPFPSNETESLEDDGYEHSPLVLYLDDDDNDNQSGMENPRGTT<br>VPYSQTQQTVPSSVEEVILFEPTQNLACGQAPYEPFIAGGVESDPFKWPWMA<br>SIFQRFTVARPHKFLCGGSLINTRYILTAAHCCVAGANNIPRPAFLVRMG<br>NHLDDQGGEDFSVSKVIVHSNFSYSGQYNDIALRLGTVAYTDRVAPVCLPD<br>VSLAEQDLEGLLATVVGWGATSVGGEHQQTLEHEIPVPTEDCVLAYSRIKS<br>AAFLARGSTHVLCAGLKEGGKSDSCSDSGGPLMMQSDGIRWTIVGIVSFGHR<br>CAEPGPGVYTKITHYLEWIIHSNAIE                          |
| 9 | U-theraphotoxin-Pv40b | Pv_sp_6027.t1 | Venom Serine protease (IPR001314;IPR001254) | Serine protease 27     | 14 | 344 | SVIYPTDPPFQEVCEANTICKEAASCPDFNTQTEICGWNGSRPMVCCTERRN<br>TGKTEKLHPNTECGIQGGTNRQAVSRISKRQAGLEIEHGEPPIVGGKDVEPF<br>PVMGALDKVAYRKNHRFLCGSSLISPRHLLTAHCFQRGDDKTPQKFSVRL<br>GAHGLKDGTRYISIRTVIHPGYNFRQNYNDIAVLTLAEIIPPSQKSLPICLPEAE<br>AGRRENLVGRSATVIGWGHTSYGGVNSRVLQMVSIPIVDTGKCNSTYMTIVH<br>RTFPRGITDDFLCAGVEEGKSDSCQNDSGGPLQISDGGRFIQVGIVSFGYGCA<br>EPGPGVYTRVASYVPWINEVMAKTL                      |
| 9 | U-theraphotoxin-Pv41a | Pv_sp_3053.t1 | Venom Serine protease (IPR001314;IPR001254) | Complement C2          | 10 | 362 | ALFMITDGEPNVGDGKITPRDAASSLKEKNDFEIFTVGIGKGINTDFLTSIASEP<br>PESHVFIKKYSQLKDMISIIRTLPEERPKEGPEKCGYIDESRKPTERYERWPWLA<br>AVYTSFPKADVQQPGHFKMSLCAGALICRDWVLTAAASCFHETNRREIVLSLR<br>EVFVAGEHNILEIDKSQKNYYATDVQTHPDFDPFNPLNLLALIRLNEAVPL<br>NITFRPICLPRTDLIRPLHEDLATNTSTAGWGRPLKLGFTHGINAATTNFNLR<br>KPIALAEEGECLRRLKRKAMGNIFCAGVGESDCLGTIGSPIIAQDPNTEIRHILG<br>VLTDKSDCNQGYSQLFELRRYIPWIDGITNSCRLRHQM |
| 9 | U-theraphotoxin-Pv40a | Pv_sp_5436.t1 | Venom Serine protease (IPR001314;IPR001254) | Enteropeptidase        | 14 | 368 | SVTFPGGSSNRDGCEDSPKGTVCVVSRCPGFNRMKRCGWSNLEPKVCCEE<br>KKLAPVSLPQNLNCGIRPKRNPSCALRKKRETAQDRLWRALQLSKSIESLPLN<br>APEPGLGLRVSKPSVVGQVEPLSYPWMAALDKKTYGTNFRFHCGASLISG<br>RHILTAHCFKLGEEKSPNTFTVRLRAHLKTGGTRYNVRKIEIHPGYNGRENY<br>NDIAILSREVSITDYVSPICLPQAETSRVRNLTGTTAHVLGWGHTSYGGVDS<br>QVLLEASLPVVDTAQCNAAYKNVASRSFPRGITNYLLCAGYNEGGKDACQN<br>DSGGPLQVLTNNRWFFQIGIVSFGYGCAEPGPGVYTRVSRYVPWIEEVMKTS |
| 9 | U-theraphotoxin-Pv43b | Pv_so_7495.t1 | Venom Serine protease (IPR001314;IPR001254) | Proclotting enzyme     | 14 | 381 | IGSPCVTPDRREGQCVLTECPVLLRVNNFNRLRRFICGYEDEVPKVCPEESI<br>GGQPQTPRPPTTRTPPPPTPTPTTRTPPTPARRTPTPTTRTPSPRPQPTPPSV<br>PGRSRPDLPLSDCGHSNTTKTRIVGGREAEGAWPMAVVYQTKRGGRKSP<br>DCGGALVSRSHIVTAHCVVGRGIEPLSPSVLSVRLGEHDLYSDDDDMNVPVEI<br>NVRSVRRHDFRDPRTYRNDIAVLLLERPVEFNPNIQPICLPYDSLKDEDLTDRS                                                                                                            |



|   |                               |               |                                                       |                                         |    |     |                                                                                                                                                                                                                                                                                                                                                                                                                                                                                                                                                                             |
|---|-------------------------------|---------------|-------------------------------------------------------|-----------------------------------------|----|-----|-----------------------------------------------------------------------------------------------------------------------------------------------------------------------------------------------------------------------------------------------------------------------------------------------------------------------------------------------------------------------------------------------------------------------------------------------------------------------------------------------------------------------------------------------------------------------------|
|   |                               |               |                                                       |                                         |    |     | GFVSGWGTTSFNGASSNVLEVSFPIVDDEFCDRAFRQDLPTDVYICAGTAD<br>GSKDSCQGDSCGGPLMLPGRGGRFYLGIVVSFGKRCAEPGYPGVYTRITKFLDW<br>LTQNLSS                                                                                                                                                                                                                                                                                                                                                                                                                                                    |
| 9 | U-<br>theraphotoxin<br>-Pv43a | Pv_sp_2944.t1 | Venom Serine<br>protease<br>(IPR001314;IPR00<br>1254) | Transmembran<br>e protease<br>serine 12 | 14 | 429 | SIIFPKESSETEEEGPQPCVTPRGRNGHCVIVTRCQLLWNHRRNYSLLRRLNCG<br>YQGEVPKVCCPVHSTPSTQQTITTTTTTTTTTSPVSTGRYPYQGRRRPLAGIPLL<br>PPHEEPGTRGQAALDRSGSVTKKLPSGSSQESIGSNKGVNNSKLATIGRNYDEI<br>ISLLPKCEGKNDVPLRRIVGGHESIIGAWPWLAALYLTRRGIKTAECGGALVT<br>AKHVITAACHCTVNSRRGTTFDASQIIVRLGDHDLSDDEDGLTPVEVRVSNIIK<br>HENFVLRTFQNDIAILELVSSVQFHKYVTPLCLPYGVFQGGDLAGRNAFVAG<br>WGTTSFDPGASSKLEVLRIWENSDCGVFRDVPITNVNLCAGDGDGDAC<br>RGDSGGPLMLPYRDGKFYMGVIVSFGKKCAEPGIPGVYTRITAFLDWIANNIK<br>STL                                                                                                  |
| 9 | U-<br>theraphotoxin<br>-Pv47a | Pv_sp_3992.t1 | Venom Serine<br>protease<br>(IPR001314;IPR00<br>1254) | Serine protease<br>27                   | 14 | 449 | CRYRRTPGTCKRRSECNQPTRRVCRVGLDPVCCDRPDEDHFKPSIIFPQETPQ<br>QRPRPTTRKPSIIFPQETPAPRPKPSTPRPRPSTPRLRPSTPRPRPSTPRPKPPQAA<br>KPPPPKPAPOKVPDLTFPGCGSRSPSPVDNNAARTSARIGGSGGRSSRRRGFWR<br>SKREISASYDAGDLVDNEPAVKRFRKQMFPRPVVGGIMAKPNSWPWMTAV<br>FKKSTPGSTSRFLCGASLISTLYVISAACHCFDAERGNIDPSKFTVSLGAHNTRDG<br>TEYPVESIKIHPNYQQRQYYNDLSILKTARPVKLTNKVYPVCMPOPTIVSRIVT<br>HQNVTTITGWGDTSFGGVGSKVLHEVSFPVVPQRQCNASYAKIASSTFPRGITD<br>NFICAGLEEGKDACQGDSCGGPLVMNTVEDKWVQVGVVSFGYGCAQPGFP<br>GVYTRVEKYTQWLYDNSDLGRQ                                                                          |
| 9 | U-<br>theraphotoxin<br>-Pv49a | Pv_sp_3247.t1 | Venom Serine<br>protease<br>(IPR001314;IPR00<br>1254) | Serine protease<br>27                   | 14 | 475 | CSTGEGRAGICVAKRYCREAVASPRQTLTACSGTSGFYCCPVPTARSSSEDSSSS<br>DQAPPAAPVRPTPSAVGTSTPRRDIRYPESDSRYRPGSNAEQSDYSSSSSTHD<br>GKYRYPDKDDSPRETRVKEPDNTNSGSRHYHGEVRLPNRDKPSTKRPIYEDQ<br>DRKHVPNNNSRRPSVQRTTSSLPRRNDRSQEKYTTPTSLIKFPPEYKPPHPAP<br>ACGQKPYELFIAGGEESRQHEWPWMVAIFRRHSSPKPNTYICGGSLNRRYILT<br>AAHCFIHNYVILPASTFVVRLLGAHYLDSEGYTVANLVVHQNHSGSDDFFNDI<br>ALIRLASEVFFTDKIAPICLPTREMSYKTFVDRMATVAGWGSTAFYRIADSRVL<br>QHVSVPVLLNEECSSAYSVRVGA AFLARGTDHIICAGLREGGKDACLDGSGG<br>PLMLKGDDDDSWTVIGIVSLGYKCAEPGYPGVYTRVTHYLSWIYSNMKN                                                 |
| 9 | U-<br>theraphotoxin<br>-Pv54a | Pv_sp_3640.t1 | Venom Serine<br>protease<br>(IPR001314;IPR00<br>1254) | Neurotrypsin                            | 28 | 524 | VEVLVNGQWGNVCVDNWQYKEAQVVCRLGYPLGALEATKRSQYGTGTG<br>NYVLCGLICFGNESSISECGLDIFPCSRCSRGAAGVVCREYEKTCPEYYFKCQ<br>NDRCVDYGSVCDGFDDCKDGSDEFPSLCKEPEVRLVDGNDKYSGRVEIKFLN<br>IWGTICDDTFDDKDAQVICHSLGFRGPATAHGNAFFGPGNGVIWLDGLHCN<br>GSEAKITRCPRERWALHDCKQYEAAGVTCSSPQGHDLIESMECGIESGDHISP<br>NYEFRRLPGRSSLKLEINRMTSPMLSSRATALRFPARRRVARMVFSEKITLLA<br>SFPWIADVRYHAQGKSYHACGAAILSEFFIVTAACHCNKHTKRDYIIRVGEFD<br>QNKKDRFEEDFEVERIIHEKFNEAVRLNNDIALVKLRQKAKRGHIFSEDVRPI<br>CLPTPETPYLPEIWA AVGGWGITEHSTKSSILRLAYVPLSPVQCKGFTDYGTN<br>KIRPGMLCAGHIDGGSDACKADSGGPLVTKFNGRSTLLGIVSWGHCGEA |

|    |                       |               |                                             |                                    |    |     |                                                                                                                                                                                                                                                                                                                                                                                                                                                                                                                                                                                                                                                                                                                                                                                                                                                                                                                                                                                                                                                                                            |
|----|-----------------------|---------------|---------------------------------------------|------------------------------------|----|-----|--------------------------------------------------------------------------------------------------------------------------------------------------------------------------------------------------------------------------------------------------------------------------------------------------------------------------------------------------------------------------------------------------------------------------------------------------------------------------------------------------------------------------------------------------------------------------------------------------------------------------------------------------------------------------------------------------------------------------------------------------------------------------------------------------------------------------------------------------------------------------------------------------------------------------------------------------------------------------------------------------------------------------------------------------------------------------------------------|
| 9  | U-theraphotoxin-Pv59a | Pv_sp_2198.t1 | Venom Serine protease (IPR001314;IPR001254) | Neurotrypsin                       | 18 | 655 | SCGSGRCPGNRRNQDSDHPGGNNKNDNPGGRDKDRPAILGPDDWPSSSTGGRP<br>GIGSDYQPDTVGGGGGSDKDRPAILGPDDWPSSSTGGRP<br>GTYEKDDYVPKPVSGGGGGGRDDYNPKPVTGGGGGGGRDDYNPKPVRGGG<br>GGGARDDYNPKPVRGGGGGGGRDDYNPKPVTGGGGGAGGERDDYNPKPVR<br>GGDDYNPKPVRGGNDDYNPKPVRGGNDDYNPKPVRGGDDYNPKPVRGG<br>DDDDYNPKPVRGGNDHNPKEPWSPTDRHPKPIESNDNPKDDSYNDGS<br>SKDNIRENIRPGGNCICVPYYQCKDGHIVTDGAGIIDARRKPNNEEELPLDGK<br>FKPPSCGPFHVCCNTPETSTVKPYEHRGVRNPSGINSRILSPSNAGEADFG<br>WPWQAAVLKSEGTVNIFQCGGVLDKYHVLTVAHCVFHLRKYNVFPLKIRLG<br>EWDQTSTSEFLAHEDYKVSIIHPEFRNHSLWNDLAILKLEEAFLFAPHIDTV<br>CLAKHDENFAGQNCVVTGWGKDAYKGGTFSNMKEVAVPVIDNYNCEEM<br>LRKTRLGRFFQLHEGFLCAGGEHGLDSCKGDDGGGPLVCYRKDRSYALAGIVS<br>WGIDCGQPGVPGVYVKIQKFLDWISKNTGLQLEDYWPKSY                                                                                                                                                                                                                                                                                                                                                                                |
| 9  | U-theraphotoxin-Pv61a | Pv_sp_435.t1  | Venom Serine protease (IPR001314;IPR001254) | Prothrombin                        | 56 | 993 | ILPIGNLDIGLGVNVNGKPEPKQCDPTDITCTCGIGGRSIFIRVPQCTYAHRW<br>KTKCKPCDKMEPKDVCCKFQNCQLCHLNGGDQCASCPPRKFNGWCENDCF<br>CENGGDCCRSGRCICLPGFAGLCERRKGCPPPQLVAPPLQENRQPPNNPAT<br>IVYACPSDYVLRGSPAITCQPEGQWSGSPQCLRKCPVLSAPANGREYTSNES<br>VEGTSAITRCNDNFQLVGQSTIHCLPGGVWSSSLPRCKRLSSCSDPGSAHSTR<br>HIESSNGLQTGPFLGTQIQYSCLEDYEQMGTDITCLSDGKWSDERGVCLKV<br>SSISPDCSTRGEEIAEEIGVPVRILCPPECANGAPRLWGTSTYKKESAVCPAAVH<br>SGIVTNTGGLVDVISNGEYDHFVGSNLNNVRSQSSDDRADSFRFNKVPPLVIS<br>KDEKGCPCNLLRLQKSCVYASNNRRNKAEAEIACKNLGLHLSFADSDEERK<br>NLFAVLSEKGITKIWTEKAENHRADGTAPNSCETASISDANTITEEPADCQMR<br>TNFVCAYGSNIRPLASCQDQGTLTNGQPKAVGKIGDVYVGSSEIYTCDTLHY<br>MKGERIVYCTSNGTWSAPKPTCTRLNTCEAPQVPIGGGVKYFPPLSNGGTQRS<br>GDVRTAIQASRMARLPAGLAAPVPASLSGSSPPQDEEEIENIELPPGVYRVGTR<br>AMYDCESRYQLVGSRTTRCESRGNWGRPPTCIPVCGRSDSPSPFIVNGNA<br>SDIGQWPWQTAIARWLPDYSRWFLCGASLLNERWVITAAHCVTYAASTLPI<br>DPDRFQVYVGKYHREDSKDDEHVQVKVHEIHIHPDYDPNLFADIALQLLE<br>TAVQLNSRVQPVCLPSEQTSRENLENGRQGVVTGWGMNENETYSETLQAV<br>LPVVSHTGCEKGYRDSKLPLTITDNMYCAGFAQGKTDACSGDSGGPMVFLDE<br>SAKERRWILEGIVSWGSPSGCGHANQYGGFTTVSKFLDWIHLFF |
| 10 | U-theraphotoxin-Pv28a | Pv_sp_8942.t1 | Protein disulfide-isomerase (IPR005792)     | DnaJ homolog subfamily C member 10 | 6  | 258 | EEKLLVLFTTECCSCTECVETEVLGAMSADIENTFNLPVVKLKKTDMRKSYG<br>VKTVPVSLVFIRNGKPVQFDGQFEKEALFIWIQDNLDPATTHLDDHNFEHLTQ<br>AATGATTGDWLVAFYSTACFKESNLTNMEGAGSHLRNVRNVALVDTEKSP<br>ELVQRFKIKHCPEIIFRLGKMYRFSLSSESSALALKRFAEGFYKNSKSETVPVPKS<br>PFDKLEQLFESTRQYMFELTVFMITLTLVVMFIILSVLKKGQE                                                                                                                                                                                                                                                                                                                                                                                                                                                                                                                                                                                                                                                                                                                                                                                                             |
| 11 | U-theraphotoxin-Pv30a | Pv_tr_4119.t1 | Protein disulfide-isomerase (IPR005792)     | Protein disulfide-isomerase A5     | 6  | 283 | KLTVQSMVNFLLKDPGSDMPWEEDEHAQDIVHIPDANALGKVLHKEKVPIML<br>MFYAPWCGFCRKLKPEYEAATELKGHSILAAMDVNKPNISVRKHFNITGF<br>PTLLFFEGLNLKHKYDGNNKDSIVSFMRNPTKQPEKPEPEWADTPSDVVH                                                                                                                                                                                                                                                                                                                                                                                                                                                                                                                                                                                                                                                                                                                                                                                                                                                                                                                           |

|    |                               |               |                                                |                                          |   |     |                                                                                                                                                                                                                                                                                                                                                                                                                                                                                                             |
|----|-------------------------------|---------------|------------------------------------------------|------------------------------------------|---|-----|-------------------------------------------------------------------------------------------------------------------------------------------------------------------------------------------------------------------------------------------------------------------------------------------------------------------------------------------------------------------------------------------------------------------------------------------------------------------------------------------------------------|
|    |                               |               |                                                |                                          |   |     | LTDAFMSEIQSEPSVLVMFYAPWCGHCKKMKPEYVTVAARLKQQNIPGML<br>AAVDATKEKTLADQYKINGYPTLKYFRNGEFQFDVSLRTADQIEEFMMDPKE<br>PPPPPEKEACSSHVLCMTMVWPLQ                                                                                                                                                                                                                                                                                                                                                                      |
| 11 | U-<br>theraphotoxin<br>-Pv33a | Pv_so_7333.t1 | Protein disulfide-<br>isomerase<br>(IPR005792) | DnaJ homolog<br>subfamily C<br>member 16 | 8 | 296 | YDLHGEEGLKDDFGSGWQGSFRSWNYYESFGIYDDDDPEIITLSRSDFEQSVIG<br>ARDTWFINFYSPQCCHHLAPAWRALARELEGVIRIGAVNCEEDWMLCRQ<br>QNIHSYPSLMMYPQQTKYGRSRTDSMVDYVLQQLPDVVIEITGHNQFELVS<br>REEYKVHPWLISVCKEEDCLSEALRKLLEGLVNVAKAEYGLDRAVCDK<br>LDCRSLITFYNSLSPVETVAVHQIKETEVKPVLENEVLLLLPGATEMTEEMFQN<br>VRKGDLSYKWPWLHFTKSSLKESDGNMDEL                                                                                                                                                                                          |
| 11 | U-<br>theraphotoxin<br>-Pv44a | Pv_tr_7700.t1 | Protein disulfide-<br>isomerase<br>(IPR005792) | Protein<br>disulfide-<br>isomerase       | 4 | 434 | TEEHVLVLNKNDFDEAVKDKNVLVEFYAPWCGHCKALAPEYAKAAEKLEE<br>EKSEIKLAKVDATEETELAEKHGVRGYPTIKFFRDGKILEYTGGRSDDIIRWLK<br>KKTGPPASDLSSADGAKSFIEGSEVVVVGFFKDQDSKDAKVFKDVAEMDDY<br>PFGITSDDVVYNELKASKDGVILFKKFDLRNEYDGELSDEELKKFVKSNSLPL<br>VVEFSHETAQKIFGGEIKAHNLLFISKESADYSEKVFVKVAKDFKNKVLFT<br>INTEEDHERIMEFFGLKKEEAPTMRILKLEEMTKYKPETAGISEDEIRNFVQC<br>VVDGKVKQHLLSEDIPEDWNKEPVKVLVGKNFDEIAFDKSKNVLVEFYAPW<br>CGHCKQLAPIYDQLGEKYKSSADVIAKMDATANELEHTKINSFPTIKLYRKD<br>TNEVIDYNGE                                   |
| 11 | U-<br>theraphotoxin<br>-Pv46b | Pv_sp_3707.t1 | Protein disulfide-<br>isomerase<br>(IPR005792) | Protein<br>disulfide-<br>isomerase       | 6 | 448 | VHEHDTILVEFFAPWCGHCKRLAPEYDQAAAAALKKADPPVPLAKVDCTSDS<br>GKDTCSKYGVSGYPTLKIFRGGEFSSEYNGPREADGIKYMKSQVGPSSKELKS<br>VEDAETFLSKDDVVIVGFFKDTSSKLKEEFLKVADKMRSSSTFGHTVEPEVLSK<br>YEFSEQIVLFRPKKYWSKFEPQAVQYTGSAADKGQIQQFVKETYHGLVGHRTH<br>DNHEDFKAPLIVAYDYDVYVKNVKGNTYWRNRMKVAQNYKDKVNFASIN<br>KDKFSAEVEDYGLTTKGDKPIVAARNTKLQKFNMKKEFSIENFEKFVQDFVD<br>GKLEPHLKSEVPETNDGPVKVAVAQNFEEVLTENTKDVLEFYAPWCGHCK<br>KLAPTYEELGTRMADEDVEIVKMDATANDVPAPFEVHGFPPLYWLPKNQKS<br>SPQRYEGGRELDDFIKYISKHATDELNDYDRK              |
| 11 | U-<br>theraphotoxin<br>-Pv48a | Pv_sp_3723.t1 | Protein disulfide-<br>isomerase<br>(IPR005792) | Calsequestrin-<br>2                      | 8 | 467 | VCHLTAENYTTVLSAAEVAVVVFTAPQPTKQPTVCPTELDNFAEVSAQVLRK<br>KNIIVCEASADLLTSQQTAPVPQVNAGDVYIYKKGQGVPPYGRSTPALLSFL<br>FKVNGTQVNVITGKIDKIAFDVQGTQKIVGFFMQGTADYNAFEAAAKLSPS<br>VAFYVAFDRVVAKHLKLETVGQIHLIKPLEKTPPCPNPASAADIEAFVGSQ<br>KGAILTKMNEHNLYDPLQDPSRTLVAIGEEASSFGGYFHLVTKLVRNNT<br>NNTFEKLNIVWIEPQIFPTIHLMMSELETTLGIPNKLPAFGTVNITSMQSAWL<br>NTALLNTTSDKTSDEANLKILQDFLSSVINNTIVPVKIGSQSFVQMPASQVVAE<br>GSDVLLCEVLENLVGDCLWLRNGQNIGFNLARFTQYSWRGDQTAGDCSLQIT<br>GIQKGRDDGEWVCEVTGDAENPTVTSSPAKIAISGAADTLAKSEL |
| 12 | U-<br>theraphotoxin<br>-Pv38a | Pv_sp_4280.t1 | Cystatin<br>(IPR027214)                        | Cysteine<br>proteinase                   | 8 | 339 | SLSQMYKLDYFNCDLDDSSKGQRSVSDKEHIERGMFADFVAKFSKVYSEEEEE<br>LRFRIQENLEKIKLHNDLERGTAKYGVTKFADLTATEFRKYALGFRPDLLDE<br>DNPLPLASTPKDPIPTSFDRWTKGIVTEVKDQGCQGCSCWAFSTTGNIEGQWAI<br>KKTKLVSLSEQELVDCDKVDEGCNGGLPSNAYKEIIRLGGLEGEKDYPYEGED                                                                                                                                                                                                                                                                            |

|   |                               |                |                                                                          |                                                                                        |   |     |                                                                                                                                                                               |
|---|-------------------------------|----------------|--------------------------------------------------------------------------|----------------------------------------------------------------------------------------|---|-----|-------------------------------------------------------------------------------------------------------------------------------------------------------------------------------|
|   |                               |                |                                                                          |                                                                                        |   |     | EKCNLNKTEVRVYINSSLAISQNETEMAAWLVKNGPISIGINANAMQFYGGI<br>SHPWKFLCSPKNLDHGVLI VGYGVHSYPLFKKTLPFWIKNWSWGATWGEQGY<br>YRVYRGDGT CGLNLMATSSVVD                                      |
| - | U-<br>theraphotoxin<br>-Pv5a  | Pv_sp_10092.t1 | Huwentoxin-1<br>family, Lectin<br>subfamily<br>(IPR011696;PF077<br>40;)  | Kappa-<br>theraphotoxin-<br>Gr1a                                                       | 2 | 26  | FCTFLVHAAPAKKRQRFFCVIDSSTQ                                                                                                                                                    |
| - | U-<br>theraphotoxin<br>-Pv6a  | Pv_sp_14704.t1 | Huwentoxin-1<br>family, Jztx 36<br>subfamily<br>(IPR011696;PF077<br>40;) | Kappa-<br>theraphotoxin-<br>Gr2c                                                       | 6 | 30  | DCRQWKQPCNNQYRCCKGSYCAMVCIQMWG                                                                                                                                                |
| - | U-<br>theraphotoxin<br>-Pv8a  | Pv_sp_8204.t1  | Magi-1<br>superfamily, Ltx4<br>family<br>(IPR012627;PF080<br>92;)        | U1-<br>theraphotoxin-<br>Tal1a                                                         | 6 | 37  | CLGENVPCDKDRPNCCSKYECLEPTGYGWYASYCY                                                                                                                                           |
| - | U-<br>theraphotoxin<br>-Pv9a  | Pv_tr_11074.t1 | Huwentoxin-1<br>family<br>(IPR011696;PF077<br>40;)                       | U1-nemetoxin-<br>Csp1a                                                                 | 6 | 37  | KCKPYGQKCKTPQDCCSEACSSDNECSNREVVLMLYG                                                                                                                                         |
| - | U-<br>theraphotoxin<br>-Pv10a | Pv_tr_16283.t1 | Plectoxin<br>superfamily<br>(IPR004169;)                                 | U8-agatoxin-<br>Ao1a                                                                   | 8 | 42  | ACVRRGSSCDGKPNDCCPNSSRCNLWGTNCR CERAGLFQQW                                                                                                                                    |
| - | U-<br>theraphotoxin<br>-Pv11a | Pv_sp_11289.t1 | Cystatin<br>(IPR027214)                                                  | Cystatin-C                                                                             | 4 | 69  | QVVAGVNYGITFTVGLTTCKKEEVDYKDINACEFQDNISTYRKCDVIIYRNLD<br>DEYKLTWSGCILTKPE                                                                                                     |
| - | U-<br>theraphotoxin<br>-Pv14a | Pv_tr_15647.t1 | Peptidylglycine<br>alpha-amidating<br>monooxygenase<br>(IPR000720)       | Peptidyl-<br>glycine alpha-<br>amidating<br>monooxygenas<br>e                          | 4 | 107 | LPLLMPDVQPMQKETYLCTAYKMPRSDEYIYEFEPNATMHTAHHILIYGCSL<br>PGRWERDSPRLVWDCGEMVGVHRGFISGPTCSSGSQIYAWAKDAPPLKLPE<br>VS                                                             |
| - | U-<br>theraphotoxin<br>-Pv21a | Pv_tr_14111.t1 | Leucine rich<br>peptide<br>(IPR032675)                                   | Insulin-like<br>growth factor-<br>binding<br>protein<br>complex acid<br>labile subunit | 6 | 164 | LAKNNLTQISAGDFDSYPHLGLLVDDNCVSEIENDALGRLEYLMRLWLNG<br>NCLSKVPPNLPSSLALYMEENRLTELTSYFGLVKLEQLFLQRNDIRYLEIC<br>AFCDLVSLQSLDLQANQIENLTAGVFANLTNLQTLDL SQNILKLLDSRCFEAP<br>CSYTEL |

|   |                       |               |                                                                        |                                                                    |    |     |                                                                                                                                                                                                                                                                                                                                                                                                                                                                                                                                                                                                             |
|---|-----------------------|---------------|------------------------------------------------------------------------|--------------------------------------------------------------------|----|-----|-------------------------------------------------------------------------------------------------------------------------------------------------------------------------------------------------------------------------------------------------------------------------------------------------------------------------------------------------------------------------------------------------------------------------------------------------------------------------------------------------------------------------------------------------------------------------------------------------------------|
| - | U-theraphotoxin-Pv26a | Pv_so_6369.t1 | Protein disulfide-isomerase (IPR005792)                                | Thioredoxin domain-containing protein 15                           | 8  | 231 | NEDYHLPSSSVTMEADAKSQENGTVEGNTVLTNATSGSENKTSVKVECLLG<br>ELEEGEIPAVHLINGTMLIKIFSAPANNSTAGECSIVMFYSPYCVFSARAAPHF<br>NALARVFPGVKCYAVDAMTNGNLHLRYGLVAVPNVMLFHKGKPIARFNET<br>HLNLERLVTFIEKYTGLOQYNGTLNVTSADMSGPVPSTLSKKVDYVLILAWIFTI<br>CCMCYGFSGSTLCHKIIESV                                                                                                                                                                                                                                                                                                                                                      |
| - | U-theraphotoxin-Pv27a | Pv_sp_3913.t1 | Insecticidal toxin ABC family, Calisoga subfamily (IPR012626;PF08091;) | Disintegrin and metalloproteinase domain-containing protein unc-71 | 12 | 255 | YIELALILDQAFFEMHNSPPKEVIGNAIQMINCADLHYHSLNASISLVHIELWT<br>EDVIHVEPNIEQNQLNIQEYLEQQYDRRSMDAIHMLSGAAFNDSSVSGAAETD<br>SICTVKA VGITKVGNIHQTHVTSHVITHMLGHNLMGYHDHDCCTCPYKSGC<br>HMLNHIQSVQPFHFSSCSIEDYFRTLKRGYGVCLFNMPMLRESICNGNGILEKG<br>EECDCGTSEVGMDIATRETAQLLTISVHSCGEVALKQQIQFVTRG                                                                                                                                                                                                                                                                                                                          |
| - | U-theraphotoxin-Pv31a | Pv_tr_2015.t1 | Thyroglobulin-like protein                                             | U35-theraphotoxin-Cg1a                                             | 18 | 287 | ADALEQMSGSSSGDSSHQEKQCRDLRENFDCLWQTSMLKREEQDSNSDV<br>IWKTWRYLGGFCEKYINWWANPCFQRDDIKRCE SRLPSKNSLDDGQSCRMFV<br>NFRDCVTSIASNSCSNSDRSLLGSYFTEKKGKQAWRCPKDSMDTSLPAASAQ<br>QTDRRYPDMYGDSDSSCLVNARTELRCQDRFQNAQSEAMRRDDSDMRN<br>HQLCCGLVAYKECLEGAKEKCGPSDTGRIDNIYKTAESQVKVDCTETAESCK<br>GNGASSIPTNAAAIYFLLYLG YFFSVKTL                                                                                                                                                                                                                                                                                            |
| - | U-theraphotoxin-Pv45a | Pv_sp_2844.t1 | Leucine rich peptide (IPR032675)                                       | Leucine-rich repeat protein soc-2 homolog                          | 6  | 442 | APAGCPPADLISPCQCRSFVSAQVKCENVYDLEIVRSALSHRFP HGLRTLHISN<br>SNILVLPDHAFTNISLTRLIDGSNIRQIDEDAFAGQEDLLFSLQNDRLFDVPI<br>SALSRLTQLRALILSDNLLIFLGQDAFADLDHLINLVLRRNRRISRIERG VFPRNL<br>DTLSLSGNLLTTLNRTLIGLSHLSWLFDFDNRLTSLKGELNGLEKLELLSLNN<br>QIPDLED SLGDLHSLEILDVSYNNLHRVGNLSRLSSLKKLDLSFN YFTELES DS<br>FSSLSQLTQLDLSGNQLMTVSLNLYGSLHRLNLSANDLTSLEYEDLKGMSR<br>LRELDLSHNKLNLDGTFGFQSELTVLKLQDNQLKRLHRS LKNLRLDKVLD<br>VRDNQLTTLHTSQMKHNKQLEILEIGGNPLSCDDDHLDVLDL KTRMVKV<br>TGQPF CYLDENTL                                                                                                                   |
| - | U-theraphotoxin-Pv57a | Pv_sp_2795.t1 | Peptidylglycine alpha-amidating monooxygenase (IPR000720)              | Dopamine beta-hydroxylase                                          | 14 | 535 | VPDVYVWAVGFSNRGLVTNADFCFLWTDKRGKNQLQDVWV TDEAGYVNVD<br>DHNDCELLNLKRRGHVTRLAWSRKFDTCDPQDYIEDGTTHVVYAVGKGPI<br>RRLEGIRIVNEKHG FQRVHLLKNLAPAPVFPDDTQTITINNDKVHVPAL ETTY<br>WCSLHLLPKGFENKKHIIQYAASI QEGNEPVVHHMEVFHCEVSPEQKLPPWN<br>GPCHSDEKPTVLEACKRVLA AWAMGALPFYYP EEAGLP IGGPDFSRYVMLEV<br>HYNNPELKADWIDSSGITLWYTPTLREFDAGVMELGLE YTDKMAIPAHQESF<br>TLTGVCVSECTRAGLPPEGIVIFGSQLHHTLTGIVVYTKHIRGGQELPELN RDN<br>HYSTHFQEIRFLKRRVRVWPGDALLTTCHYSTMDRQNITLGGFAISDEMCVN<br>YVHYFPKTDLEVCKSSIDSQVLNSYFRYMNQYNDEPTSEDKGISDNYNSIHW S<br>QNNGDFLHQLYYNAPLSMQCNKSSGDRFPGYWE GVPRT EVLYPLPPPKKCC<br>FDKVRNNEDLISAVES |

**Table S3.** Summary of the mature toxins from the merge transcriptome of *Pamphobeteus verdolaga* obtained with the BLAST (Arachnoserver + ToxProt) and HMM (hmmcompete) prediction strategies with odd cysteine number.

| Cluster | Given name                       | sequence_id    | HMM family_name                                                                                | Blast2GO annotation             | Cys | Length | Proposed mature sequence                                                                                                                                                                                                                                                                                            |
|---------|----------------------------------|----------------|------------------------------------------------------------------------------------------------|---------------------------------|-----|--------|---------------------------------------------------------------------------------------------------------------------------------------------------------------------------------------------------------------------------------------------------------------------------------------------------------------------|
| 3       | U-theraphotoxin-Pv13a (Fragment) | Pv_sp_11560.t1 | Thyroglobulin-like protein                                                                     | Thyroglobulin                   | 11  | 105    | WMLPKCQDDGTFTPMQCYPGTTACMCVAADGSPLTLPGFVNVTAACDCFTE<br>YYKMWLKDEHSPVLP RCADDGTFKPLQCNKAEGVCWCVDKTGRVLTGPSK<br>DTKSC                                                                                                                                                                                                 |
| 5       | U-theraphotoxin-Pv19a (Fragment) | Pv_sp_11018.t1 | Angiotensin-converting Enzyme (IPR033591)                                                      | Acetylcholinesterase            | 3   | 134    | HSHSFHDRDFFPVVTTSTGDIRGKQVNLDGKKVTAFLGIPYAEPVGDQRFKR<br>SVPKQSWSGVYDATKKPPCMQYSTGDFQWTTNSTPSEDCLYNVWVPGKM<br>NFCELESKSKPVLLWIYGGGFLRVNLNRNT                                                                                                                                                                         |
| 6       | U-theraphotoxin-Pv23a (Fragment) | Pv_sp_7347.t1  | Venom Kunitz-type family, Long Kunitz domain containing protein (IPR002223;IPR020901;PF00014;) | Tissue factor pathway inhibitor | 19  | 200    | TCPGDLYIGDVCSLPKKVGPCRAAMPRIYFNKETGRCEFTFYGGCSGNYNF<br>ETKEQCNSYCFQDKPRYPRDIEICDLDPDRGNCDSRLERYFNRTWKCEKF<br>TSGCGGNRNRFVYLFECERSCPGDIDLGDICSLGLEPGIPGTNISCLALIPRY<br>FNKGSGNCEEFTFGCGGNYNFKTMEECQRFCTMGPPPS                                                                                                        |
| 8       | U-theraphotoxin-Pv24c (Fragment) | Pv_tr_12866.t1 | Tachylectin 5A (IPR002181)                                                                     | Angiopoietin-1                  | 5   | 215    | NDTTREKECVLSQVDMHLSIAAEFVERARKNVPNDLKGVCCKICPGEKPRD<br>CSDIYKNGHHEDGSYEIFPLSRVMHRPLTVYCDMTKNGGGWTVIQRGDFGR<br>STDYFFQGWDSYKIGFGDVMKDFWIGNDNIFALTNRNNQLRFDLTDWDG<br>NTRYATYDEFWISDDIHNYLHVQGYDGTAGDSFGRHNGHNFTTKDRDND<br>MRSSTNWWSTA                                                                                 |
| 8       | U-theraphotoxin-Pv24b (Fragment) | Pv_sp_8847.t1  | Tachylectin 5A (IPR002181)                                                                     | Fibrinogen-like protein 1       | 7   | 257    | LNLASKMLETARTELNRNDMKQLCQSNSTGNFGCNKWRSSHAPGKPIDCSDI<br>YNDGYHTSGIYQIWPQSKISNGPLVVYCDMEDGGGWTVIQRGEFGNSDDYF<br>YLGWNDYKTSFGHLLREFWIGNDNLFSLTNQRSYQLKVDLTDWEENSKYAIY<br>QEFWIDDEVHNYTLQIKGYNGTARDSMRRHNGNKFSTKDKDNDPWVGGN<br>CAEKHKGAWWYVTCRDSSLNGLYLANSATSDNGVRWYDSKILYHSLKDSV<br>M                                 |
| 8       | U-theraphotoxin-Pv32a (Fragment) | Pv_sp_2289.t1  | Tachylectin 5A (IPR002181)                                                                     | Angiopoietin-1                  | 5   | 288    | MADALQVGINTLRANLTDLTNLTRTVYDHTKNSLVTKTYFQSSLQPLMTAKE<br>ENPQFIGCMMQSQEPDERLPRDCKDVQELVENKTGIYRIQPKYATRPIFVYCD<br>METEGGGWTVIQRRRDGSVDLFREWSYKYGFGNVGSEFWLGNENLYLITH<br>QALYELRVLDYDFDDGHAYS KYDGFVAVGSEKEKFMKVLGRLTGDDAGDG<br>MTYHASIPFSTTMDNDRWEGGNCAEDHTGGWWYNQCDASNLNGQYLA<br>GLTPQEYKGVYWHEWQGPNYSLMGTQMMIRPMKH |
| 8       | U-theraphotoxin                  | Pv_sp_798.t1   | Tachylectin 5A (IPR002181)                                                                     | Fibrinogen C domain-            | 13  | 517    | IGGGCPINDLKFFLTCKIDSLAASTALLSECLECDRDSLKVDLHTSVRNV MEN<br>VSKRLHLCTTSDLERTVKGILDSKLKTTTDTLQEDISFKLGKVGHQLEDVKQEC<br>GKLNDEEASPSIRRDSHTGVHDIA YSHDTPQELRSGGKHGGDDSGIPKETPGR                                                                                                                                          |

|    |                                             |               |                                                       |                                       |    |     |                                                                                                                                                                                                                                                                                                                                                                                                                                                                                                                                                                                                                                                                                                                                                           |
|----|---------------------------------------------|---------------|-------------------------------------------------------|---------------------------------------|----|-----|-----------------------------------------------------------------------------------------------------------------------------------------------------------------------------------------------------------------------------------------------------------------------------------------------------------------------------------------------------------------------------------------------------------------------------------------------------------------------------------------------------------------------------------------------------------------------------------------------------------------------------------------------------------------------------------------------------------------------------------------------------------|
|    | -Pv53a<br>(Fragment)                        |               |                                                       | containing<br>protein 1               |    |     | IFRKLWRKMTEPINKVGEKIEALAHVVETSNQKHHNETVSRLTRELSSKDKDS<br>EPCTKQLETVAESTKETAQRLGYIESRQLTVQNMCSKILVEVERMRNTVETGK<br>IGIGVGTRLGVTTETLDGAAKPGYEVAKSCAELQEQQIVTDGVYNIKPNGAAA<br>EFLAYCDLTTEGGGWTVIQRGDYGEHLRQNFTQGWDAYKRGFGDFQREF<br>WLGNEKISLLSTQEDVKLRVELEDFDGNNTAYAEYSRFRVADESQQFLLSVGEY<br>QGNATDSLHDKGMFSTEDRDNDDEVSAACCNCADTFKGGWWYYRCFEANL<br>NGPYQTNPTDNGYFLGIIWERWKG DYSLKSSEM KIRPLSFEDVRDP                                                                                                                                                                                                                                                                                                                                                          |
| 9  | U-<br>theraphotoxin<br>-Pv35a<br>(Fragment) | Pv_sp_6381.t1 | Venom Serine<br>protease<br>(IPR001314;IPR00<br>1254) | Enteropeptidas<br>e                   | 11 | 321 | VCCDLPLVLGENLLRTIEEEKARNRECGTQFPTGYNTSPTEERFQNIYRDIPID<br>RDDQYKYRPPLDFTNYSDFGILVAGGEPATEGQYPWMIAIFKGPTFWCGGTLI<br>DRSHLSAAHCFVNSRDELNPSTDYARVGSIRRNNTVPFKISKIVPHEDYDPRK<br>HYNDIAMLTLECEILTPYVGHCILPDIQLASRDLTGQNVTVLWGDLYYGGP<br>QSRILQRVTVPVVSNQDQNTVYQSMARNSIPQGLTSDFCAGREEGGKDACQ<br>YDSGGPLMHWSEYDYLWTLVGVSFGYNCAVPGYPGVYTRVSSHMDWITRQ<br>ANEV                                                                                                                                                                                                                                                                                                                                                                                                      |
| 10 | U-<br>theraphotoxin<br>-Pv60a<br>(Fragment) | Pv_sp_59.t1   | Protein disulfide-<br>isomerase<br>(IPR005792)        | Protein<br>disulfide-<br>isomerase A5 | 15 | 684 | EMLFKLIEDQDFLAVFFYAENDKESEEAHQLEHIDDDCGEFAIHLVKSSDKI<br>MAKKYGIRNPPGLVLFNRNGQHRYGGDLKDQEEVLEWLINPENVATSDIVEK<br>VNSKMFERLLQRFDYIAVFFYSKIGCKMCNKVLDELEKIDDEAEADGVHIVQI<br>EDHALAKKYGVFAYPALLFFRGEENEPIIYAGDIRSGDRMLDWLLTQKDPSTD<br>YIEEMEGPLPLQNLIDTADHLAVFFYDKHLCSNCDDDRKDAMECEDCQIILDE<br>LENIDDDTDLRHGQFIKTNDLGLAKKYGIKLPALVYEEQQVPSIYEGDLAAE<br>EEVLQWLIQQKSEDTIETVNKEMLEKLIATQYLAVFFYKAHCRACDVALQEL<br>ENIDDDTDLYGIYVVRIDQLQVAKRYGIKTFPALVYFRNGNPLIYDGLKNEE<br>GVLEWLIDDDNRELDPDEITVNLRLMLNKLVEESPFLAVFFYDLNCEYECERVL<br>ELENIDDECDFIDGLVKIFDPEAARQYNVHSVPAVGFFRKQVPMFYDGLDFD<br>EEKLLKWLTSNDVFEIKDEIEEVNRKMLEKLEDFNEFVAVYFYDNNCPKDE<br>ALQELERIDDEADDLEIMFVKIKDPRYSRKFGIAQLPSLVYFRKKFPSIYRGNLL<br>EEDEVLEWLRLKNRYRHPENLNFMYGLGALSLSFILYTVFLVFCFNKNKE |
| 11 | U-<br>theraphotoxin<br>-Pv46a<br>(Fragment) | Pv_sp_2488.t1 | Protein disulfide-<br>isomerase<br>(IPR005792)        | Protein<br>disulfide-<br>isomerase    | 5  | 477 | AMGIVDYMKQLADPNWKPPAEAVITLTSENFTDAVNAAIILVEFYAPWCG<br>HCKNLAPEYERAARVLKDLPTPIILAKVDATVEKELGDKYEATGYPTLLIFRK<br>GKKYRYEGPRDERGIIFYMKDQAKPVSREVNSYKSLKNSMSKTDVIVGFFNS<br>QFENLYEQYVESADFLRGKLQFFHTFDPQIAKQFGVTTSKIVLYQPEIYSSAYEP<br>SKYEFTDIDGTTDDIKMFYRDHILPLVGERSPKSRWQYQDKYPLVVVYFDVNF<br>SFEHRVQTQLVRKEVAKVAKDFKGQITFAVSNEEDYQDELAALSLDDSGEDV<br>NAAYFASEKARYRMEPVEDFSADELREFVENVQAGNIRRHISQPPKENGK<br>PVISVVGSTFEELVTKSNKDVLLFEYAPWCGFCKKFEPTYKKLGKMF AENDKV<br>IICKIDAAANDYPEQFEVRGFPVYIIPASDKENAIHYEGERDLNALADFVNN<br>QL                                                                                                                                                                                                                             |
| 12 | U-<br>theraphotoxin                         | Pv_sp_3295.t1 | Latrotoxin<br>superfamily,<br>Alpha latrotoxin        | Cathepsin K                           | 11 | 476 | EDLGNYSYKVAAYMPDKLGNPIHTCFEVDGNENNTVVIQSILPDLTNFTFV<br>KSVACTSQNGIVTSNTDCELWYEDSYGNKVNRYMYIRKSDRSPVHYIMKG<br>YNTLLGSHYDKYELVYTGYPGNVSDSDFEVHTAGACRSFPGPGVQEMVLN                                                                                                                                                                                                                                                                                                                                                                                                                                                                                                                                                                                           |

|   |                                             |                |                                                       |                                                                                |    |     |                                                                                                                                                                                                                                                                                                                                                                                                                                                                                                                                                                                                                                                   |
|---|---------------------------------------------|----------------|-------------------------------------------------------|--------------------------------------------------------------------------------|----|-----|---------------------------------------------------------------------------------------------------------------------------------------------------------------------------------------------------------------------------------------------------------------------------------------------------------------------------------------------------------------------------------------------------------------------------------------------------------------------------------------------------------------------------------------------------------------------------------------------------------------------------------------------------|
|   | -Pv50a<br>(Fragment)                        |                | family<br>(IPR002110;IPR020683;IPR013829;P<br>F00023) |                                                                                |    |     | NPMQEFINKVDGHTHAADFDDFTSLHEKKYSSQKEQELRKTFIRQNYRFVNSM<br>NRAGLSYYLKINHLADYTDQEIHRIRGRLPKGYNGGKPFKEEFSNDLPDNL<br>DWRLYGAVTQVKDQAVCGSCWSFGTTGTIEGAYFLKTSNLVRLSQQQLIDCS<br>WNFQNNCGDGGEDFRAYQYIMDAGGLASEDDYGSYLGVGDGKCHDKNVTK<br>TAKISGYVNVTSGLSLALRQAIKKGPISVSIDASHKSFSFYSHGVYDSECKN<br>GPDDLHDHSLAVGYGVMNDEPYWIVKNSWSTYWGNDGYVLMSEQDNNCG<br>VETSPTYVIMAD                                                                                                                                                                                                                                                                                           |
| - | U-<br>theraphotoxin<br>-Pv15a<br>(Fragment) | Pv_sp_8973.t1  | Cystatin<br>(IPR027214)                               | Cystatin                                                                       | 7  | 108 | NVEDDDVVKRIANFVVSENNKQSDSPYCEKLVEVINASTQIVAGINYRITFDTA<br>PTSCLKNDQNCSEMTDCSVLECAPHKRCVANIWSKPWLNSTRIENIEYTERSN<br>SC                                                                                                                                                                                                                                                                                                                                                                                                                                                                                                                             |
| - | U-<br>theraphotoxin<br>-Pv16a<br>(Fragment) | Pv_so_1217.t1  | Leucine rich<br>peptide<br>(IPR032675)                | Zinc finger<br>protein 225                                                     | 7  | 110 | LAETPAKAGCPRKEDIHPCECLEIPRYPQEGDVQVTETVAFCKTIRNVQVLQN<br>AMKGMQGHVTDFMVLDSCKLPPFPNGLFYNINIKWMEVINSTIQVNEGFFK<br>CASNCW                                                                                                                                                                                                                                                                                                                                                                                                                                                                                                                            |
| - | U-<br>theraphotoxin<br>-Pv34a<br>(Fragment) | Pv_so_6686.t1  | Leucine rich<br>peptide<br>(IPR032675)                | Leucine-rich<br>repeats and<br>immunoglobul<br>in-like<br>domains<br>protein 3 | 13 | 308 | QASGSNPCSCYYKNSCGCYCEPITWEQFQLLPANFRSCERFTLALRGGTFYSF<br>PPDYFSRVGSRDFALDVGDSKFTDLLDSPVKGVNFDNAAFLRFNNVTVT<br>NSWNWGAFRDLTPTLPLSYCEIQVLYSTVQSLSADFGRICQGSVTVVNVMYSK<br>MATMDDGVFTNFRKLNEVDLSGNKLQSMRRSYFSMPANELETINLSYNNIRS<br>LPNNMFTEMPSLQKVLDLKGNPITTLDETTFRSIFPYVEIIGIEGFPLNCDCRLRW<br>LKEPGQQCGKNLYGLAGAVCNDPTRLRGRSFFNDTLPRDLVC                                                                                                                                                                                                                                                                                                             |
| - | U-<br>theraphotoxin<br>-Pv58a<br>(Fragment) | Pv_tr_11685.t1 | Angiotensin-<br>converting<br>Enzyme<br>(IPR033591)   | Angiotensin-<br>converting<br>enzyme                                           | 11 | 590 | VAAYKFLHENDKVASEMCTKSAIAQWNYASNLTEENKQVMLDTQVLEADF<br>RKETWKNATKFAWKSFKKEPEIYRWFKSLILGNAALPENKLNQLNKLVD<br>MEDIYSKGVCKPQSPKGPCEWSLEPDLTEMMSKSRDYKLLKYIWKSWRDV<br>TGKTVKNDFLKYIELSNEAAKLNFGPDAGVLWRESYDSSTFEDDLEELWETLR<br>PFYQQLHAYVRRKLIHLYTTCNVKNDGPIPAHILGNMWAQWENIMNVVD<br>PPFDKAEIDVTSKMKEKNMTILEMFQISEEFFTSVGLTPMTPEFWNRSIIEKPQD<br>REIVCHASAWDFCDADQRIKMCTKVNMEDLITVHHMGHIEYYLQYAAQQP<br>TVFRDGANPGFHEAVGDVLSVATPDHLKKIGLLDEVNDKDGEIKFLMH<br>MALEKLAFLPFGYLIDQWRWKVFSGEIKPEEMNRKWWELRLKYQGVCPPE<br>RTEDELDAAAKYHVISSVPYIRYFVSTVIQFQFHKALCDAAEYRGLPHKCDIY<br>QNKKAGEVLSTVLSQGSSVPWTEAMGIMTGGVTQKMDASAILEYFDPLTKW<br>LQEKNNKNEFIGWKSDDPMLCPS |



**Table S4.** Summary of the toxin precursors with signal peptide associated sequences, from the merge transcriptome of *Pamphobeteus verdolaga* obtained with the BLAST (Arachnoserver + ToxProt) and HMM (hmmcompete) prediction strategies.

| sequence_id    | HMM family_name                                                                                | Blast2GO annotation                                                    |
|----------------|------------------------------------------------------------------------------------------------|------------------------------------------------------------------------|
| Pv_so_352.t1   | Huwentoxin-1 family, Jztx 60 subfamily (IPR011696;PF07740;)                                    | NA                                                                     |
| Pv_sp_13202.t1 | Huwentoxin-1 family, Jztx 36 subfamily (IPR011696;PF07740;)                                    | Kappa-theraphotoxin-Gr1a                                               |
| Pv_sp_15084.t1 | Huwentoxin-1 family, Lectin subfamily (IPR011696;PF07740;)                                     | Kappa-theraphotoxin-Gr1a                                               |
| Pv_sp_12559.t1 | Huwentoxin-1 family, Lectin subfamily (IPR011696;PF07740;)                                     | Kappa-theraphotoxin-Gr1a                                               |
| Pv_so_347.t1   | Venom Kunitz-type family, Native Kunitz toxin subfamily (IPR002223;IPR020901;PF00014;)         | Kunitz-type kappaPI-theraphotoxin-Hs1b                                 |
| Pv_so_222.t1   | Spider WAP family, Spider wap 1 family (IPR008197;)                                            | U15-lycotoxin-Ls1d                                                     |
| Pv_sp_14336.t1 | Spider WAP family, Spider wap 1 family (IPR008197;)                                            | U14-lycotoxin-Ls1b                                                     |
| Pv_tr_261.t1   | MIT-like CsTx-21                                                                               | Astakine                                                               |
| Pv_sp_12447.t1 | Huwentoxin-2 family, TXP1 subfamily (IPR012625;PF08089;)                                       | Omega-theraphotoxin-Ba1c                                               |
| Pv_tr_2182.t1  | Spider WAP family, Spider wap 1 family (IPR008197;)                                            | U15-lycotoxin-Ls1d                                                     |
| Pv_sp_13299.t1 | Huwentoxin-1 family, BsTX5 subfamily (IPR011696;PF07740;)                                      | Toxin-like protein 14                                                  |
| Pv_sp_8246.t1  | MIT-like CsTx-21                                                                               | Astakine                                                               |
| Pv_sp_9798.t1  | MIT-like AcTx family (IPR020202;PF17556)                                                       | Astakine                                                               |
| Pv_so_3402.t1  | Leucine rich peptide (IPR032675)                                                               | NA                                                                     |
| Pv_sp_13292.t1 | MIT-like CsTx-21                                                                               | U33-theraphotoxin-Cg1c                                                 |
| Pv_sp_9171.t1  | Huwentoxin-1 family, Lectin subfamily (IPR011696;PF07740;)                                     | Kappa-theraphotoxin-Gr1a                                               |
| Pv_sp_11881.t1 | MIT-like CsTx-21                                                                               | NA                                                                     |
| Pv_so_464.t1   | MIT-like AcTx family (IPR020202;PF17556)                                                       | U33-theraphotoxin-Cg1c                                                 |
| Pv_so_5544.t1  | MIT-like AcTx family (IPR020202;PF17556)                                                       | Astakine                                                               |
| Pv_tr_6792.t1  | Spider toxin Tx2 family, Spider Tx2 sb1 (IPR004214;PF02950;)                                   | Hainantoxin-XV-3                                                       |
| Pv_sp_12979.t1 | AVIT (prokineticin) family (IPR023569;PF06607;)                                                | U34-theraphotoxin-Cg1a                                                 |
| Pv_sp_9651.t1  | MIT-like AcTx family (IPR020202;PF17556)                                                       | U34-theraphotoxin-Cg1a                                                 |
| Pv_sp_12678.t1 | MIT-like CsTx-21                                                                               | U1-hexatoxin-Iw1e                                                      |
| Pv_so_1872.t1  | MIT-like CsTx-22                                                                               | U34-theraphotoxin-Cg1a                                                 |
| Pv_sp_11357.t1 | MIT-like AcTx family (IPR020202;PF17556)                                                       | Colipase                                                               |
| Pv_so_2836.t1  | Leucine rich peptide (IPR032675)                                                               | Leucine-rich repeat-containing protein 4B                              |
| Pv_tr_10028.t1 | Venom Kunitz-type family, Long Kunitz domain containing protein (IPR002223;IPR020901;PF00014;) | Tissue factor pathway inhibitor                                        |
| Pv_tr_10034.t1 | Venom Kunitz-type family, Long Kunitz domain containing protein (IPR002223;IPR020901;PF00014;) | Kunitz-type U19-barytoxin-TI1a                                         |
| Pv_sp_6867.t1  | Venom Serine protease (IPR001314;IPR001254)                                                    | Chymotrypsin-like elastase family member 2A                            |
| Pv_sp_8677.t1  | Tachylectin 5A (IPR002181)                                                                     | Fibrinogen C domain-containing protein 1                               |
| Pv_sp_7161.t1  | Tachylectin 5A (IPR002181)                                                                     | U33-theraphotoxin-Cg1c                                                 |
| Pv_sp_9105.t1  | Tachylectin 5A (IPR002181)                                                                     | Ficolin-2                                                              |
| Pv_sp_8711.t1  | Tachylectin 5A (IPR002181)                                                                     | Fibrinogen C domain-containing protein 1                               |
| Pv_so_6999.t1  | Leucine rich peptide (IPR032675)                                                               | Insulin-like growth factor-binding protein complex acid labile subunit |

|                |                                                                                                |                                                                          |
|----------------|------------------------------------------------------------------------------------------------|--------------------------------------------------------------------------|
| Pv_so_7124.t1  | Leucine rich peptide (IPR032675)                                                               | Leucine-rich repeat-containing G-protein coupled receptor 4              |
| Pv_sp_6615.t1  | Leucine rich peptide (IPR032675)                                                               | Leucine-rich repeat-containing protein 4C                                |
| Pv_so_6904.t1  | Leucine rich peptide (IPR032675)                                                               | Leucine-rich repeat and fibronectin type-III domain-containing protein 5 |
| Pv_sp_5116.t1  | Leucine rich peptide (IPR032675)                                                               | Slit homolog 2 protein                                                   |
| Pv_tr_4644.t1  | Leucine rich peptide (IPR032675)                                                               | Leucine-rich repeat and fibronectin type-III domain-containing protein 4 |
| Pv_sp_3739.t1  | Cysteine rich secretory protein type 2                                                         | CRISP/Allergen/PR-1                                                      |
| Pv_tr_10255.t1 | Peptidylglycine alpha-amidating monooxygenase (IPR000720)                                      | Dopamine beta-hydroxylase                                                |
| Pv_sp_2598.t1  | Huwentoxin-1 family, Hntx 3 subfamily (IPR011696;PF07740;)                                     | Serotransferrin                                                          |
| Pv_tr_12500.t1 | Latarcin superfamily, Lt7 family (IPR018802;PF10279;)                                          | Neprilysin                                                               |
| Pv_sp_1860.t1  | Latarcin superfamily, Lt7 family (IPR018802;PF10279;)                                          | Endothelin-converting enzyme 1                                           |
| Pv_sp_1652.t1  | Latarcin superfamily, Lt7 family (IPR018802;PF10279;)                                          | Neprilysin                                                               |
| Pv_tr_11735.t1 | Venom Serine protease (IPR001314;IPR001254)                                                    | Vitamin K-dependent protein C                                            |
| Pv_tr_7613.t1  | Leucine rich peptide (IPR032675)                                                               | Toll-like receptor 2                                                     |
| Pv_tr_11818.t1 | Venom Serine protease (IPR001314;IPR001254)                                                    | Complement C2                                                            |
| Pv_sp_270.t1   | Tachylectin 5A (IPR002181)                                                                     | Collagen alpha-2(I) chain                                                |
| Pv_so_5188.t1  | Tachylectin 5A (IPR002181)                                                                     | Angiopoietin-1                                                           |
| Pv_sp_5783.t1  | Venom Serine protease (IPR001314;IPR001254)                                                    | Transmembrane protease serine 11B-like protein                           |
| Pv_tr_10029.t1 | Venom Kunitz-type family, Long Kunitz domain containing protein (IPR002223;IPR020901;PF00014;) | Tissue factor pathway inhibitor                                          |
| Pv_so_7554.t1  | Leucine rich peptide (IPR032675)                                                               | TLR4 interactor with leucine rich repeats                                |
| Pv_sp_1472.t1  | Leucine rich peptide (IPR032675)                                                               | Follicle-stimulating hormone receptor                                    |
| Pv_sp_1726.t1  | Leucine rich peptide (IPR032675)                                                               | Leucine-rich repeat neuronal protein 3                                   |
| Pv_sp_2386.t1  | Protein disulfide-isomerase (IPR005792)                                                        | Protein disulfide-isomerase A6                                           |
| Pv_sp_4414.t1  | Protein disulfide-isomerase (IPR005792)                                                        | Protein disulfide-isomerase                                              |
| Pv_so_5747.t1  | Tachylectin 5A (IPR002181)                                                                     | Fibrinogen C domain-containing protein 1                                 |
| Pv_tr_2163.t1  | Tachylectin 5A (IPR002181)                                                                     | Fibrinogen C domain-containing protein 1                                 |
| Pv_so_2969.t1  | Tachylectin 5A (IPR002181)                                                                     | Fibrinogen C domain-containing protein 1                                 |
| Pv_sp_4498.t1  | Tachylectin 5A (IPR002181)                                                                     | Fibrinogen C domain-containing protein 1                                 |
| Pv_tr_15765.t1 | Leucine rich peptide (IPR032675)                                                               | Leucine-rich repeat transmembrane neuronal protein 1                     |

**Table S5.** Summary of the toxin precursors with pro-peptide associated sequences, from the merge transcriptome of *Pamphobeteus verdolaga* obtained with the BLAST (Arachnoserver + ToxProt) and HMM (hmmcompete) prediction strategies.

| sequence_id    | HMM family_name                                                                                | Blast2GO annotation                                   |
|----------------|------------------------------------------------------------------------------------------------|-------------------------------------------------------|
| Pv_sp_13737.t1 | Magi-1 superfamily, ICK 7 family (IPR012627;PF08092;)                                          | NA                                                    |
| Pv_sp_2911.t1  | Magi-1 superfamily, HWTX XVIc family (IPR012627;PF08092;)                                      | NA                                                    |
| Pv_sp_13425.t1 | Helical arthropod neuropeptide derived (HAND) family                                           | Zinc finger protein 2                                 |
| Pv_sp_7755.t1  | Latarcin superfamily, Lt1 family (IPR018802;PF10279;)                                          | NA                                                    |
| Pv_sp_15140.t1 | Huwentoxin-1 family, ProTx 1 subfamily (IPR011696;PF07740;)                                    | NA                                                    |
| Pv_tr_4168.t1  | Huwentoxin-1 family, F4a subfamily (IPR011696;PF07740;)                                        | NA                                                    |
| Pv_sp_12914.t1 | Protein disulfide-isomerase (IPR005792)                                                        | Thioredoxin                                           |
| Pv_sp_4182.t1  | Latarcin superfamily, latarcin lt4 typ2 (IPR018802;PF10279;)                                   | NA                                                    |
| Pv_so_7191.t1  | Huwentoxin-1 family, Jztx 15 subfamily (IPR011696;PF07740;)                                    | NA                                                    |
| Pv_sp_14895.t1 | Huwentoxin-1 family, HpTx1 subfamily (IPR011696;PF07740;)                                      | NA                                                    |
| Pv_tr_16201.t1 | cstx38                                                                                         | Zinc finger and BTB domain-containing protein 49      |
| Pv_sp_6690.t1  | Latrotoxin superfamily, Alpha latrocrustotoxin family (IPR002110;IPR020683;PF00023)            | Osteoclast-stimulating factor 1                       |
| Pv_sp_14524.t1 | Cupiennin family, 1 subfamily                                                                  | NA                                                    |
| Pv_sp_13936.t1 | Venom Kunitz-type family, Long Kunitz domain containing protein (IPR002223;IPR020901;PF00014;) | NA                                                    |
| Pv_sp_6028.t1  | Huwentoxin-1 family, Jztx 13 subfamily (IPR011696;PF07740;)                                    | NA                                                    |
| Pv_tr_12299.t1 | Latrotoxin superfamily, Alpha latrocrustotoxin family (IPR002110;IPR020683;PF00023)            | Integrin-linked protein kinase                        |
| Pv_sp_14414.t1 | CsTx-20                                                                                        | Diphthamide biosynthesis protein 3                    |
| Pv_tr_10321.t1 | Latrotoxin superfamily, Delta latroinsectotoxin family                                         | Ankyrin repeat domain-containing protein 54           |
| Pv_tr_10510.t1 | Venom Serine protease (IPR001314;IPR001254)                                                    | Prothrombin                                           |
| Pv_so_1499.t1  | Latrotoxin superfamily, Alpha latrocrustotoxin family (IPR002110;IPR020683;PF00023)            | Ankyrin repeat domain-containing protein 65           |
| Pv_tr_7995.t1  | Spider agouti family (IPR007733;IPR027300;PF05039;)                                            | NA                                                    |
| Pv_sp_13194.t1 | Huwentoxin-1 family, Jztx 36 subfamily (IPR011696;PF07740;)                                    | NA                                                    |
| Pv_so_2810.t1  | Huwentoxin-1 family, Jztx 21 subfamily                                                         | NA                                                    |
| Pv_sp_9338.t1  | Latrotoxin superfamily, Alpha latrocrustotoxin family (IPR002110;IPR020683;PF00023)            | Acyl-CoA-binding domain-containing protein 6          |
| Pv_sp_2895.t1  | Huwentoxin-1 family, Hntx 13 subfamily (IPR011696;PF07740;)                                    | NA                                                    |
| Pv_sp_14139.t1 | Latrotoxin superfamily, Alpha latroinsectotoxin family (IPR002110;IPR020683;PF00023)           | Myotrophin                                            |
| Pv_tr_12363.t1 | Huwentoxin-1 family, ProTx III subfamily (IPR011696;PF07740;)                                  | NA                                                    |
| Pv_tr_16488.t1 | Latrotoxin superfamily, Alpha latrotoxin family (IPR002110;IPR020683;IPR013829;PF00023)        | Ankyrin repeat domain-containing protein 2B           |
| Pv_sp_8040.t1  | Spider Agouti                                                                                  | NA                                                    |
| Pv_so_4181.t1  | Protein disulfide-isomerase (IPR005792)                                                        | Nucleoredoxin                                         |
| Pv_so_1170.t1  | Shiva Omega superfamily, Omega toxin family (IPR009415;PF06357;)                               | Zinc finger protein 225                               |
| Pv_tr_15975.t1 | Cysteine rich secretory protein type 0                                                         | Golgi-associated plant pathogenesis-related protein 1 |
| Pv_so_3587.t1  | Leucine rich peptide (IPR032675)                                                               | Leucine-rich repeat protein soc-2 homolog             |
| Pv_so_2925.t1  | Latrotoxin superfamily, Delta latroinsectotoxin family                                         | Nuclear factor NF-kappa-B p105 subunit                |

|                |                                                                                              |                                                                            |
|----------------|----------------------------------------------------------------------------------------------|----------------------------------------------------------------------------|
| Pv_so_1535.t1  | Latrotoxin superfamily, Alpha latrocrustotoxin family (IPR002110;IPR020683;PF00023)          | Ankyrin repeat and SAM domain-containing protein 3                         |
| Pv_so_2617.t1  | Protein disulfide-isomerase (IPR005792)                                                      | Nucleoredoxin                                                              |
| Pv_so_2795.t1  | Venom Serine protease (IPR001314;IPR001254)                                                  | Transmembrane protease serine 7                                            |
| Pv_sp_10463.t1 | Protein disulfide-isomerase (IPR005792)                                                      | Translationally-controlled tumor protein homolog                           |
| Pv_tr_6629.t1  | MIT-like CsTx-22                                                                             | NA                                                                         |
| Pv_so_4644.t1  | Latrotoxin superfamily, Alpha latrotoxin family (IPR002110;IPR020683;IPR013829;PF00023)      | Protein fem-1 homolog C                                                    |
| Pv_tr_16263.t1 | Spider toxin Tx2 family, OAIP 2 subfamily (IPR004214;PF02950;)                               | NA                                                                         |
| Pv_so_4384.t1  | Tachylectin 5A (IPR002181)                                                                   | Angiopoietin-1                                                             |
| Pv_so_2168.t1  | Latrotoxin superfamily, Delta latroinsectotoxin family                                       | Serine/threonine-protein phosphatase 6 regulatory ankyrin repeat subunit B |
| Pv_tr_10358.t1 | Leucine rich peptide (IPR032675)                                                             | Leucine-rich repeat transmembrane protein FLRT3                            |
| Pv_so_2871.t1  | Venom Serine protease (IPR001314;IPR001254)                                                  | Vitamin K-dependent protein C                                              |
| Pv_so_5010.t1  | Cysteine rich secretory protein type 1 (IPR014044;IPR002413)                                 | GLIPR1-like protein 1                                                      |
| Pv_sp_2976.t1  | Omega-agatoxin superfamily, Type II III omega agatoxin family (IPR005853;IPR013605;PF08396;) | NA                                                                         |
| Pv_sp_9706.t1  | Protein disulfide-isomerase (IPR005792)                                                      | Phosducin-like protein 2                                                   |
| Pv_tr_293.t1   | Huwentoxin-1 family, Hntx 8 subfamily (IPR011696;PF07740;)                                   | Arginyl-tRNA--protein transferase 1                                        |
| Pv_sp_7974.t1  | Thyroglobulin-like protein                                                                   | Thyroglobulin                                                              |
| Pv_tr_12046.t1 | Latrotoxin superfamily, Alpha latrocrustotoxin family (IPR002110;IPR020683;PF00023)          | Ankyrin-3                                                                  |
| Pv_sp_3206.t1  | Huwentoxin-1 family, Jztx 9 subfamily (IPR011696;PF07740;)                                   | Zinc finger protein 143                                                    |
| Pv_sp_10034.t1 | Cysteine rich secretory protein type 1                                                       | Golgi-associated plant pathogenesis-related protein 1                      |
| Pv_sp_11473.t1 | cstx38                                                                                       | Gastrula zinc finger protein XICGF57.1                                     |
| Pv_sp_5365.t1  | Huwentoxin-1 family, F4b subfamily (IPR011696;PF07740;)                                      | Ubiquitin domain-containing protein 1                                      |
| Pv_sp_10087.t1 | Protein disulfide-isomerase (IPR005792)                                                      | Thioredoxin-related transmembrane protein 2                                |
| Pv_sp_6233.t1  | Latarcin superfamily, latarcin lt4 typ2 (IPR018802;PF10279;)                                 | Electron transfer flavoprotein subunit alpha                               |
| Pv_so_6467.t1  | Latarcin superfamily, Lt7 family (IPR018802;PF10279;)                                        | Endothelin-converting enzyme 1                                             |
| Pv_tr_11557.t1 | Latrotoxin superfamily, Alpha latrocrustotoxin family (IPR002110;IPR020683;PF00023)          | Serine/threonine-protein phosphatase 6 regulatory ankyrin repeat subunit C |
| Pv_tr_12300.t1 | Latrotoxin superfamily, Alpha latrocrustotoxin family (IPR002110;IPR020683;PF00023)          | Ankyrin-3                                                                  |
| Pv_sp_6882.t1  | Protein disulfide-isomerase (IPR005792)                                                      | Protein disulfide-isomerase TMX3                                           |
| Pv_so_4811.t1  | Latrotoxin superfamily, Alpha latrotoxin family (IPR002110;IPR020683;IPR013829;PF00023)      | Ankyrin repeat and SOCS box protein 3                                      |
| Pv_tr_16804.t1 | Latrotoxin superfamily, Delta latroinsectotoxin family                                       | Ankyrin repeat and SOCS box protein 13                                     |
| Pv_tr_2249.t1  | cstx38                                                                                       | Zinc finger protein 436                                                    |
| Pv_so_6543.t1  | Huwentoxin-1 family, Hntx 9 subfamily (IPR011696;PF07740;)                                   | WD repeat-containing protein 5B                                            |
| Pv_sp_7373.t1  | Latrotoxin superfamily, Alpha latrocrustotoxin family (IPR002110;IPR020683;PF00023)          | Ankyrin-3                                                                  |
| Pv_tr_17368.t1 | Latrotoxin superfamily, Alpha latrocrustotoxin family (IPR002110;IPR020683;PF00023)          | Ankyrin-3                                                                  |
| Pv_so_6587.t1  | Latrotoxin superfamily, Alpha latrocrustotoxin family (IPR002110;IPR020683;PF00023)          | Ankyrin repeat and SOCS box protein 11                                     |
| Pv_so_6201.t1  | Leucine rich peptide (IPR032675)                                                             | Leucine-rich repeat transmembrane neuronal protein 1                       |
| Pv_tr_16681.t1 | Venom Serine protease (IPR001314;IPR001254)                                                  | Transmembrane protease serine 11B-like protein                             |
| Pv_sp_8099.t1  | Huwentoxin-1 family, Jztx 21 subfamily                                                       | NA                                                                         |
| Pv_sp_8012.t1  | Huwentoxin-1 family, Hntx 3 subfamily (IPR011696;PF07740;)                                   | FAM8A1                                                                     |

|                |                                                                                         |                                                                            |
|----------------|-----------------------------------------------------------------------------------------|----------------------------------------------------------------------------|
| Pv_sp_8234.t1  | Tachylectin 5A (IPR002181)                                                              | Fibrinogen C domain-containing protein 1                                   |
| Pv_tr_15867.t1 | Latrotoxin superfamily, Alpha latroinsectotoxin family (IPR002110;IPR020683;PF00023)    | Ankyrin-3                                                                  |
| Pv_tr_13675.t1 | Latrotoxin superfamily, Alpha latrocrustotoxin family (IPR002110;IPR020683;PF00023)     | Serine/threonine-protein phosphatase 6 regulatory ankyrin repeat subunit B |
| Pv_sp_8136.t1  | Tachylectin 5A (IPR002181)                                                              | Fibrinogen C domain-containing protein 1                                   |
| Pv_so_6474.t1  | Latrotoxin superfamily, Alpha latrocrustotoxin family (IPR002110;IPR020683;PF00023)     | Ankyrin repeat and SOCS box protein 7                                      |
| Pv_tr_8828.t1  | Latrotoxin superfamily, Alpha latrocrustotoxin family (IPR002110;IPR020683;PF00023)     | Ankyrin repeat and SOCS box protein 2                                      |
| Pv_sp_5082.t1  | Protein disulfide-isomerase (IPR005792)                                                 | Thioredoxin                                                                |
| Pv_tr_3696.t1  | Latrotoxin superfamily, Alpha latrotoxin family (IPR002110;IPR020683;IPR013829;PF00023) | Serine/threonine-protein phosphatase 6 regulatory ankyrin repeat subunit B |
| Pv_sp_7286.t1  | Protein disulfide-isomerase (IPR005792)                                                 | DnaJ homolog subfamily C member 10                                         |
| Pv_tr_9561.t1  | Latrotoxin superfamily, Alpha latrotoxin family (IPR002110;IPR020683;IPR013829;PF00023) | Ankyrin-3                                                                  |
| Pv_sp_8525.t1  | Tachylectin 5A (IPR002181)                                                              | Fibrinogen C domain-containing protein 1                                   |
| Pv_sp_4874.t1  | Magi-1 superfamily, ICK 30 40 family (IPR012627;PF08092;)                               | Protein real-time                                                          |
| Pv_sp_7694.t1  | Tachylectin 5A (IPR002181)                                                              | Fibrinogen C domain-containing protein 1                                   |
| Pv_sp_180.t1   | Latrotoxin superfamily, Alpha latroinsectotoxin family (IPR002110;IPR020683;PF00023)    | Tonsoku-like protein                                                       |
| Pv_sp_4490.t1  | Leucine rich peptide (IPR032675)                                                        | Leucine-rich repeat transmembrane neuronal protein 3                       |
| Pv_sp_7366.t1  | Latrotoxin superfamily, Alpha latrocrustotoxin family (IPR002110;IPR020683;PF00023)     | Ankyrin repeat and SOCS box protein 5                                      |
| Pv_tr_9553.t1  | Latrotoxin superfamily, Alpha latrocrustotoxin family (IPR002110;IPR020683;PF00023)     | Ankyrin-3                                                                  |
| Pv_sp_5970.t1  | CsTx-29                                                                                 | Ubiquitin-conjugating enzyme E2 Q2                                         |
| Pv_sp_5164.t1  | Leucine rich peptide (IPR032675)                                                        | Chondroadherin-like protein                                                |
| Pv_tr_7820.t1  | Latrotoxin superfamily, Alpha latrocrustotoxin family (IPR002110;IPR020683;PF00023)     | Ankyrin repeat and MYND domain-containing protein 2                        |
| Pv_tr_10074.t1 | Latrotoxin superfamily, Alpha latrocrustotoxin family (IPR002110;IPR020683;PF00023)     | Ankyrin repeat domain-containing protein 16                                |
| Pv_tr_16230.t1 | MIT-like AcTx family (IPR020202;PF17556)                                                | Endothelin-converting enzyme 1                                             |
| Pv_tr_6219.t1  | Latrotoxin superfamily, Alpha latrocrustotoxin family (IPR002110;IPR020683;PF00023)     | Ankyrin-3                                                                  |
| Pv_sp_3877.t1  | Latrotoxin superfamily, Alpha latrocrustotoxin family (IPR002110;IPR020683;PF00023)     | NF-kappa-B inhibitor cactus                                                |
| Pv_tr_14031.t1 | Cupiennin family, cupiennin typ2                                                        | Vacuolar protein sorting-associated protein 8                              |
| Pv_tr_2557.t1  | Latrotoxin superfamily, Alpha latrocrustotoxin family (IPR002110;IPR020683;PF00023)     | Nephrocystin-3                                                             |
| Pv_sp_2305.t1  | Latrotoxin superfamily, Delta latroinsectotoxin family                                  | Ankyrin repeat domain-containing protein 13C                               |
| Pv_sp_5234.t1  | Shiva kappa superfamily (IPR012499;PF07945;)                                            | Phosphatidylinositol 4-kinase type 2-beta                                  |
| Pv_sp_4907.t1  | Latrotoxin superfamily, Alpha latrocrustotoxin family (IPR002110;IPR020683;PF00023)     | Ankyrin-3                                                                  |
| Pv_sp_3683.t1  | Protein disulfide-isomerase (IPR005792)                                                 | Protein disulfide-isomerase TMX3                                           |
| Pv_sp_2220.t1  | Latrotoxin superfamily, Alpha latrotoxin family (IPR002110;IPR020683;IPR013829;PF00023) | Ankyrin-3                                                                  |
| Pv_tr_9560.t1  | Latrotoxin superfamily, Alpha latroinsectotoxin family (IPR002110;IPR020683;PF00023)    | Serine/threonine-protein phosphatase 6 regulatory ankyrin repeat subunit C |
| Pv_so_7596.t1  | Latrotoxin superfamily, Alpha latrotoxin family (IPR002110;IPR020683;IPR013829;PF00023) | Integrin-linked protein kinase                                             |
| Pv_sp_1084.t1  | Venom Serine protease (IPR001314;IPR001254)                                             | Prothrombin                                                                |
| Pv_so_7784.t1  | Latrotoxin superfamily, Delta latroinsectotoxin family                                  | Serine/threonine-protein phosphatase 6 regulatory ankyrin repeat subunit B |
| Pv_tr_9552.t1  | Latrotoxin superfamily, Alpha latroinsectotoxin family (IPR002110;IPR020683;PF00023)    | Serine/threonine-protein phosphatase 6 regulatory ankyrin repeat subunit C |
| Pv_sp_4749.t1  | Protein disulfide-isomerase (IPR005792)                                                 | Protein disulfide-isomerase A5                                             |
| Pv_sp_3775.t1  | Leucine rich peptide (IPR032675)                                                        | Phenylalanine--tRNA ligase beta subunit                                    |

|                |                                                                                                |                                                                            |
|----------------|------------------------------------------------------------------------------------------------|----------------------------------------------------------------------------|
| Pv_sp_811.t1   | Protein disulfide-isomerase (IPR005792)                                                        | Protein disulfide-isomerase                                                |
| Pv_sp_2149.t1  | Latrotoxin superfamily, Delta latroinsectotoxin family                                         | Ankyrin-3                                                                  |
| Pv_tr_11868.t1 | Latrotoxin superfamily, Alpha latrocrustotoxin family (IPR002110;IPR020683;PF00023)            | Serine/threonine-protein phosphatase 6 regulatory ankyrin repeat subunit B |
| Pv_sp_4722.t1  | Venom Serine protease (IPR001314;IPR001254)                                                    | Inactive serine protease PAMR1                                             |
| Pv_tr_15236.t1 | Leucine rich peptide (IPR032675)                                                               | Leucine-rich repeat-containing protein 40                                  |
| Pv_tr_16028.t1 | Latrotoxin superfamily, Alpha latrocrustotoxin family (IPR002110;IPR020683;PF00023)            | Protein phosphatase 1 regulatory subunit 12B                               |
| Pv_so_7815.t1  | Latrotoxin superfamily, Alpha latrocrustotoxin family (IPR002110;IPR020683;PF00023)            | Ankyrin repeat domain-containing protein 13C                               |
| Pv_so_7889.t1  | Insecticidal toxin ABC family, Calisoga subfamily (IPR012626;PF08091;)                         | BRCA1-associated ATM activator 1                                           |
| Pv_sp_2806.t1  | Latrotoxin superfamily, Alpha latrocrustotoxin family (IPR002110;IPR020683;PF00023)            | Ankyrin repeat, SAM and basic leucine zipper domain-containing protein 1   |
| Pv_sp_2345.t1  | Latrotoxin superfamily, Delta latroinsectotoxin family                                         | Chaperone protein ClpB                                                     |
| Pv_tr_4893.t1  | Leucine rich peptide (IPR032675)                                                               | Leucine-rich repeat protein soc-2 homolog                                  |
| Pv_tr_4993.t1  | Leucine rich peptide (IPR032675)                                                               | Insulin-like growth factor-binding protein complex acid labile subunit     |
| Pv_tr_9244.t1  | Latrotoxin superfamily, Alpha latrotoxin family (IPR002110;IPR020683;IPR013829;PF00023)        | SH3 and multiple ankyrin repeat domains protein 3                          |
| Pv_tr_16673.t1 | Leucine rich peptide (IPR032675)                                                               | Platelet glycoprotein V                                                    |
| Pv_sp_1011.t1  | Latrotoxin superfamily, Alpha latroinsectotoxin family (IPR002110;IPR020683;PF00023)           | Ankyrin repeat and IBR domain-containing protein 1                         |
| Pv_sp_1671.t1  | Latrotoxin superfamily, Alpha latrocrustotoxin family (IPR002110;IPR020683;PF00023)            | Protein fem-1 homolog C                                                    |
| Pv_so_8281.t1  | Tachylectin 5A (IPR002181)                                                                     | Endothelin-converting enzyme 1                                             |
| Pv_sp_2016.t1  | Latarcin superfamily, Lt7 family (IPR018802;PF10279;)                                          | Endothelin-converting enzyme 1                                             |
| Pv_tr_4977.t1  | Peptidylglycine alpha-amidating monooxygenase (IPR000720)                                      | Endothelin-converting enzyme 1                                             |
| Pv_tr_9073.t1  | Venom Kunitz-type family, Long Kunitz domain containing protein (IPR002223;IPR020901;PF00014;) | Papilin                                                                    |
| Pv_tr_15777.t1 | Latarcin superfamily, Lt7 family (IPR018802;PF10279;)                                          | Endothelin-converting enzyme 1                                             |
| Pv_sp_1844.t1  | Latrotoxin superfamily, Alpha latroinsectotoxin family (IPR002110;IPR020683;PF00023)           | Neprilysin                                                                 |
| Pv_tr_5050.t1  | Latrotoxin superfamily, Alpha latroinsectotoxin family (IPR002110;IPR020683;PF00023)           | Endothelin-converting enzyme 1                                             |
| Pv_tr_1311.t1  | Latrotoxin superfamily, Alpha latrocrustotoxin family (IPR002110;IPR020683;PF00023)            | Protein phosphatase 1 regulatory subunit 12A                               |
| Pv_sp_965.t1   | Spider Agouti                                                                                  | Solute carrier organic anion transporter family member 1A5                 |
| Pv_sp_1085.t1  | Latrotoxin superfamily, Alpha latrocrustotoxin family (IPR002110;IPR020683;PF00023)            | Protein phosphatase 1 regulatory subunit 12B                               |
| Pv_tr_15800.t1 | Latrotoxin superfamily, Alpha latrotoxin family (IPR002110;IPR020683;IPR013829;PF00023)        | Histone-lysine N-methyltransferase SUV39H2                                 |
| Pv_sp_807.t1   | Latrotoxin superfamily, Delta latroinsectotoxin family                                         | Apoptosis-stimulating of p53 protein 1                                     |
| Pv_tr_305.t1   | Latrotoxin superfamily, Alpha latrocrustotoxin family (IPR002110;IPR020683;PF00023)            | Death-associated protein kinase 1                                          |
| Pv_sp_1095.t1  | Latrotoxin superfamily, Alpha latrocrustotoxin family (IPR002110;IPR020683;PF00023)            | Oxysterol-binding protein-related protein 1                                |
| Pv_tr_17643.t1 | Latrotoxin superfamily, Alpha latrocrustotoxin family (IPR002110;IPR020683;PF00023)            | Serine/threonine-protein phosphatase 6 regulatory ankyrin repeat subunit C |
| Pv_tr_16469.t1 | Latrotoxin superfamily, Alpha latrotoxin family (IPR002110;IPR020683;IPR013829;PF00023)        | Histone-lysine N-methyltransferase SUV39H2                                 |
| Pv_sp_885.t1   | Latrotoxin superfamily, Alpha latroinsectotoxin family (IPR002110;IPR020683;PF00023)           | Ankyrin-3                                                                  |
| Pv_so_8457.t1  | Latrotoxin superfamily, Alpha latroinsectotoxin family (IPR002110;IPR020683;PF00023)           | Inhibitor of Bruton tyrosine kinase                                        |
| Pv_sp_431.t1   | Latrotoxin superfamily, Alpha latrotoxin family (IPR002110;IPR020683;IPR013829;PF00023)        | Ankyrin-3                                                                  |
| Pv_tr_15558.t1 | Latrotoxin superfamily, Alpha latroinsectotoxin family (IPR002110;IPR020683;PF00023)           | Ankyrin-3                                                                  |
| Pv_sp_359.t1   | Latrotoxin superfamily, Alpha latrocrustotoxin family (IPR002110;IPR020683;PF00023)            | Ankyrin-3                                                                  |
| Pv_sp_364.t1   | Latrotoxin superfamily, Alpha latrocrustotoxin family (IPR002110;IPR020683;PF00023)            | Protein TANC2                                                              |

|                |                                                                                         |                                |
|----------------|-----------------------------------------------------------------------------------------|--------------------------------|
| Pv_tr_5723.t1  | Latrotoxin superfamily, Alpha latroinsectotoxin family (IPR002110;IPR020683;PF00023)    | Kinesin light chain 4          |
| Pv_tr_3655.t1  | Latrotoxin superfamily, Alpha latroinsectotoxin family (IPR002110;IPR020683;PF00023)    | Poly [ADP-ribose] polymerase 1 |
| Pv_sp_63.t1    | Latrotoxin superfamily, Alpha latroinsectotoxin family (IPR002110;IPR020683;PF00023)    | Ankyrin-3                      |
| Pv_tr_10178.t1 | Latrotoxin superfamily, Alpha latrotoxin family (IPR002110;IPR020683;IPR013829;PF00023) | Ankyrin-3                      |
| Pv_sp_4.t1     | Latrotoxin superfamily, Delta latroinsectotoxin family                                  | Ankyrin-3                      |

**Table S6.** Summary of the toxin precursors with neither signal or pro-peptide associated sequences, from the merge transcriptome of *Pamphobeteus verdolaga* obtained with the BLAST (Arachnoserver + ToxProt) and HMM (hmmcompete) prediction strategies.

| sequence_id    | HMM family_name                                                                         | Blast2GO annotation                                                        |
|----------------|-----------------------------------------------------------------------------------------|----------------------------------------------------------------------------|
| Pv_sp_4102.t1  | Huwentoxin-1 family, AU5B subfamily (IPR011696;PF07740;)                                | NA                                                                         |
| Pv_tr_13769.t1 | Magi-1 superfamily, ICK 30 40 family (IPR012627;PF08092;)                               | NA                                                                         |
| Pv_tr_726.t1   | Latrotoxin superfamily, Alpha latroinsectotoxin family (IPR002110;IPR020683;PF00023)    | Myotrophin                                                                 |
| Pv_so_1314.t1  | Latrotoxin superfamily, Alpha latrotoxin family (IPR002110;IPR020683;IPR013829;PF00023) | Ankyrin repeat domain-containing protein 29                                |
| Pv_sp_15275.t1 | Huwentoxin-1 family, Jztx F5 subfamily (IPR011696;PF07740;)                             | NA                                                                         |
| Pv_sp_15666.t1 | Huwentoxin-1 family, ProTx 1 subfamily (IPR011696;PF07740;)                             | Neprilysin                                                                 |
| Pv_tr_15994.t1 | CsTx-35                                                                                 | Ferredoxin-dependent glutamate synthase                                    |
| Pv_tr_6775.t1  | Protein disulfide-isomerase (IPR005792)                                                 | Protein disulfide-isomerase A3                                             |
| Pv_tr_9551.t1  | Latrotoxin superfamily, Alpha latrocrustotoxin family (IPR002110;IPR020683;PF00023)     | Serine/threonine-protein phosphatase 6 regulatory ankyrin repeat subunit B |
| Pv_sp_12669.t1 | Huwentoxin-1 family, ProTx 1 subfamily (IPR011696;PF07740;)                             | NA                                                                         |
| Pv_so_7116.t1  | Spider toxin Tx3-6 family                                                               | NA                                                                         |
| Pv_so_743.t1   | Huwentoxin-1 family, GrTx subfamily (IPR011696;PF07740;)                                | NA                                                                         |
| Pv_sp_13021.t1 | Protein disulfide-isomerase (IPR005792)                                                 | Thioredoxin                                                                |
| Pv_sp_13996.t1 | Huwentoxin-1 family (IPR011696;PF07740;)                                                | U11-theraphotoxin-Cg1b                                                     |
| Pv_so_1664.t1  | Thyroglobulin-like protein                                                              | Insulin-like growth factor-binding protein 5                               |
| Pv_so_2505.t1  | Latarcin superfamily, Lt7 family (IPR018802;PF10279;)                                   | NA                                                                         |
| Pv_tr_2354.t1  | Protein disulfide-isomerase (IPR005792)                                                 | Protein disulfide-isomerase                                                |
| Pv_so_3857.t1  | Latarcin superfamily, Lt6 family (IPR018802;PF10279;)                                   | NA                                                                         |
| Pv_so_3471.t1  | Huwentoxin-1 family, ProTx 1 subfamily (IPR011696;PF07740;)                             | Endothelin-converting enzyme 1                                             |
| Pv_tr_638.t1   | Huwentoxin-1 family, ScTx1 subfamily (IPR011696;PF07740;)                               | Protein O-mannose kinase                                                   |
| Pv_tr_11130.t1 | Angiotensin-converting Enzyme (IPR033591)                                               | Angiotensin-converting enzyme                                              |
| Pv_tr_4717.t1  | Venom Serine protease (IPR001314;IPR001254)                                             | Plasma kallikrein                                                          |
| Pv_sp_12615.t1 | Magi-5 family, Omega atracotoxin type 2 family (IPR012628;IPR013139;PF08093;)           | NA                                                                         |
| Pv_so_4240.t1  | Latrotoxin superfamily, Alpha latroinsectotoxin family (IPR002110;IPR020683;PF00023)    | Ankyrin repeat domain-containing protein 39                                |
| Pv_so_4504.t1  | Latrotoxin superfamily, Alpha latrocrustotoxin family (IPR002110;IPR020683;PF00023)     | Ankyrin repeat domain-containing protein 39                                |
| Pv_sp_5251.t1  | Signal Peptidase (IPR001733)                                                            | Signal peptidase complex catalytic subunit SEC11                           |
| Pv_tr_10035.t1 | Tachylectin 5A (IPR002181)                                                              | Fibrinogen C domain-containing protein 1                                   |
| Pv_tr_3301.t1  | Delta-atracotoxin family (IPR008017;PF05353;)                                           | Transposable element Tcb1 transposase                                      |

|                |                                                                                         |                                                                            |
|----------------|-----------------------------------------------------------------------------------------|----------------------------------------------------------------------------|
| Pv_sp_10768.t1 | Insecticidal toxin ABC family, Calisoga subfamily (IPR012626;PF08091;)                  | NA                                                                         |
| Pv_tr_5818.t1  | Latrotoxin superfamily, Alpha latroinsectotoxin family (IPR002110;IPR020683;PF00023)    | Ankyrin-3                                                                  |
| Pv_sp_9101.t1  | Latrotoxin superfamily, Alpha latrotoxin family (IPR002110;IPR020683;IPR013829;PF00023) | Integrin-linked protein kinase                                             |
| Pv_sp_8418.t1  | Leucine rich peptide (IPR032675)                                                        | U2 small nuclear ribonucleoprotein A                                       |
| Pv_sp_8686.t1  | Latrotoxin superfamily, Alpha latroinsectotoxin family (IPR002110;IPR020683;PF00023)    | Serine/threonine-protein phosphatase 6 regulatory ankyrin repeat subunit C |
| Pv_tr_16664.t1 | Huwentoxin-2 family, TXP1 subfamily (IPR012625;PF08089;)                                | Protein suppressor of hairy wing                                           |
| Pv_sp_6602.t1  | Angiotensin-converting Enzyme (IPR033591)                                               | Acetylcholinesterase                                                       |
| Pv_tr_17006.t1 | Cstx-37                                                                                 | RNA-directed DNA polymerase from mobile element jockey                     |
| Pv_tr_5896.t1  | Latarcin superfamily, Lt7 family (IPR018802;PF10279;)                                   | Endothelin-converting enzyme 1                                             |
| Pv_tr_6699.t1  | Latrotoxin superfamily, Alpha latrotoxin family (IPR002110;IPR020683;IPR013829;PF00023) | Ankyrin repeat and SOCS box protein 2                                      |
| Pv_sp_4842.t1  | Protein disulfide-isomerase (IPR005792)                                                 | Glutaredoxin-3                                                             |
| Pv_so_7311.t1  | Latrotoxin superfamily, Alpha latrocrustotoxin family (IPR002110;IPR020683;PF00023)     | Ankyrin-3                                                                  |
| Pv_tr_9705.t1  | Venom Serine protease (IPR001314;IPR001254)                                             | Prostasin                                                                  |
| Pv_sp_2780.t1  | Leucine rich peptide (IPR032675)                                                        | Insulin-like growth factor-binding protein complex acid labile subunit     |
| Pv_so_7402.t1  | Double-knot toxin subfamily                                                             | Dynein assembly factor with WDR repeat domains 1                           |
| Pv_sp_3698.t1  | Shiva kappa superfamily (IPR012499;PF07945;)                                            | Phosphatidylinositol 4-kinase type 2-beta                                  |
| Pv_sp_3431.t1  | Latrotoxin superfamily, Alpha latrocrustotoxin family (IPR002110;IPR020683;PF00023)     | Speckle-type POZ protein                                                   |
| Pv_tr_2037.t1  | Latarcin superfamily, Lt7 family (IPR018802;PF10279;)                                   | Myocardin                                                                  |
| Pv_tr_10546.t1 | Protein disulfide-isomerase (IPR005792)                                                 | Endothelin-converting enzyme 1                                             |
| Pv_tr_6330.t1  | Leucine rich peptide (IPR032675)                                                        | Thyroid peroxidase                                                         |
